# Supplementary material for: Primary carnitine deficiency: Estimation of prevalence in Chinese population and insights into newborn screening
Source: Front Genet. 2023 Dec 6;14:1304458. doi: 10.3389/fgene.2023.1304458 (PMC10730660; doi:10.3389/fgene.2023.1304458)
Supplement: Supplementary file 5 [file Table1.XLSX]

## Sheet: TableS1
ID	Variation_HGVS	flag	Evidence_ACMG	HGMD_type	Clinvar_type	Zygosity	Mutation_type	Exon	Amino acid change	References/Comments	gnomAD_afr(AC|AN)	gnomAD_afr_female(AC|AN)	gnomAD_afr_male(AC|AN)	gnomAD_ami(AC|AN)	gnomAD_ami_female(AC|AN)	gnomAD_ami_male(AC|AN)	gnomAD_amr(AC|AN)	gnomAD_amr_female(AC|AN)	gnomAD_amr_male(AC|AN)	gnomAD_asj(AC|AN)	gnomAD_asj_female(AC|AN)	gnomAD_asj_male(AC|AN)	gnomAD_eas(AC|AN)	gnomAD_eas_female(AC|AN)	gnomAD_eas_male(AC|AN)	gnomAD_female(AC|AN)	gnomAD_fin(AC|AN)	gnomAD_fin_female(AC|AN)	gnomAD_fin_male(AC|AN)	gnomAD_male(AC|AN)	gnomAD_nfe(AC|AN)	gnomAD_nfe_female(AC|AN)	gnomAD_nfe_male(AC|AN)	gnomAD_oth(AC|AN)	gnomAD_oth_female(AC|AN)	gnomAD_oth_male(AC|AN)	gnomAD_raw(AC|AN)	gnomAD_sas(AC|AN)	gnomAD_sas_female(AC|AN)	gnomAD_sas_male(AC|AN)	gnomAD_total(AC|AN)
Site01	NM_003060.4:c.51C>G	LP	PM1, PP1, PP3_Moderate, PP4	DM	Pathogenic	Het	missense	exon1	p.F17L	PMID 20074989	0|42064	0|22718	0|19346	0|900	0|470	0|430	0|13664	0|5914	0|7750	0|3322	0|1760	0|1562	7|3132	2|1448	5|1684	2|73862	0|10482	0|2506	0|7976	5|69468	0|64562	0|37382	0|27180	0|2154	0|1100	0|1054	7|143378	0|3050	0|564	0|2486	7|143330
Site02	NM_003060.4:c.67_69del	LP	PS3, PP1, PP4	DM	Pathogenic	Het	in-frame indel	exon1	p.F23del	PMID 12210323	0|42036	0|22700	0|19336	0|900	0|470	0|430	0|13662	0|5914	0|7748	0|3318	0|1756	0|1562	0|3132	0|1448	0|1684	3|73828	0|10476	0|2504	0|7972	0|69440	3|64548	3|37374	0|27174	0|2150	0|1098	0|1052	3|143374	0|3046	0|564	0|2482	3|143268
Site03	NM_003060.4:c.160_166dup	LP	PVS1, PM2	.	Pathogenic/Likely_pathogenic	Het	frameshift	exon1	p.A56Gfs*84	rs1057516797	.	.	.	.	.	.	.	.	.	.	.	.	.	.	.	.	.	.	.	.	.	.	.	.	.	.	.	.	.	.	.
Site04	NM_003060.4:c.148del	LP	PVS1, PM2	.	Pathogenic/Likely_pathogenic	Het	frameshift	exon1	p.C50Afs*9	rs386134227	.	.	.	.	.	.	.	.	.	.	.	.	.	.	.	.	.	.	.	.	.	.	.	.	.	.	.	.	.	.	.
Site05	NM_003060.4:c.71del	LP	PVS1, PM2, PP4	.	Pathogenic	Het	frameshift	exon1	p.L24Rfs*19	rs775502377	0|42054	0|22710	0|19344	0|900	0|470	0|430	0|13668	0|5916	0|7752	0|3322	0|1760	0|1562	0|3134	0|1448	0|1686	2|73856	0|10486	0|2506	0|7980	0|69478	2|64568	2|37382	0|27186	0|2154	0|1100	0|1054	2|143388	0|3048	0|564	0|2484	2|143334
Site06	NM_003060.4:c.95A>G	P	PS3, PM1, PP1, PP3_Supporting, PP4	DM	Pathogenic	Het	missense	exon1	p.N32S	PMID 12210323	0|42004	0|22682	0|19322	0|900	0|470	0|430	0|13644	0|5906	0|7738	0|3316	0|1754	0|1562	0|3120	0|1438	0|1682	1|73706	0|10432	0|2486	0|7946	2|69342	1|64454	0|37318	1|27136	0|2140	0|1088	0|1052	3|143286	2|3038	1|564	1|2474	3|143048
Site07	NM_003060.4:c.136C>T	LP	PP3_Strong, PM1	DM	Pathogenic/Likely_pathogenic	Het	missense	exon1	p.P46S	PMID 17126586	9|42068	4|22716	5|19352	0|900	0|470	0|430	0|13660	0|5910	0|7750	2|3324	0|1762	2|1562	0|3130	0|1444	0|1686	35|73844	1|10478	0|2506	1|7972	38|69468	59|64552	29|37372	30|27180	2|2152	2|1098	0|1054	73|143370	0|3048	0|566	0|2482	73|143312
Site08	NM_003060.4:c.137C>T	P	PP3_Moderate, PM1, PM2, PP4, PS3	DM	Conflicting_interpretations_of_pathogenicity	Het	missense	exon1	p.P46L	PMID 28841266	1|42056	1|22712	0|19344	0|900	0|470	0|430	0|13662	0|5916	0|7746	0|3322	0|1760	0|1562	0|3134	0|1448	0|1686	1|73854	0|10482	0|2506	0|7976	0|69466	0|64562	0|37378	0|27184	0|2154	0|1100	0|1054	1|143390	0|3048	0|564	0|2484	1|143320
Site09	NM_003060.4:c.248G>T	LP	PP3_Moderate, PM1, PP4, PM2_Supporting	DM	Pathogenic/Likely_pathogenic	Het	missense	exon1	p.R83L	PMID 15617188	0|42050	0|22716	0|19334	0|900	0|470	0|430	0|13670	0|5916	0|7754	0|3324	0|1762	0|1562	0|3130	0|1448	0|1682	1|73870	0|10488	0|2506	0|7982	4|69468	0|64574	0|37386	0|27188	0|2154	0|1100	0|1054	5|143396	5|3048	1|566	4|2482	5|143338
Site10	NM_003060.4:c.254_264dup	P	PVS1, PM2_Supporting, PP4	DM	Pathogenic	Het	frameshift	exon1	p.I89Gfs*45	PMID 11715001	.	.	.	.	.	.	.	.	.	.	.	.	.	.	.	.	.	.	.	.	.	.	.	.	.	.	.	.	.	.	.
Site11	NM_003060.4:c.12C>G	P	PVS1, PM2_Supporting, PP4	DM	Pathogenic	Het	nonsense	exon1	p.Y4*	PMID 11715001	.	.	.	.	.	.	.	.	.	.	.	.	.	.	.	.	.	.	.	.	.	.	.	.	.	.	.	.	.	.	.
Site12	NM_003060.4:c.83G>T	LP	PM1,PM2_Supporting, PP3_Moderate, PP4	DM	Pathogenic	Het	missense	exon1	p.S28I	PMID 12408185	.	.	.	.	.	.	.	.	.	.	.	.	.	.	.	.	.	.	.	.	.	.	.	.	.	.	.	.	.	.	.
Site13	NM_003060.4:c.3G>T	P	PVS1, PM2, PP4	DM	Likely_pathogenic	Het	start loss	exon1	p.M1?	PMID 15714519	.	.	.	.	.	.	.	.	.	.	.	.	.	.	.	.	.	.	.	.	.	.	.	.	.	.	.	.	.	.	.
Site14	NM_003060.4:c.235del	P	PVS1, PM2_Supporting, PP4	DM	Pathogenic	Het	frameshift	exon1	p.H79Tfs*51	PMID 16652335	.	.	.	.	.	.	.	.	.	.	.	.	.	.	.	.	.	.	.	.	.	.	.	.	.	.	.	.	.	.	.
Site15	NM_003060.4:c.43G>T	LP	PP3_Strong, PM1, PM2_Supporting	DM	Pathogenic/Likely_pathogenic	Het	missense	exon1	p.G15W	PMID 20027113	.	.	.	.	.	.	.	.	.	.	.	.	.	.	.	.	.	.	.	.	.	.	.	.	.	.	.	.	.	.	.
Site16	NM_003060.4:c.350G>A	P	PVS1, PM2, PP4	DM	.	Het	nonsense	exon1	p.W117*	PMID 20574985	.	.	.	.	.	.	.	.	.	.	.	.	.	.	.	.	.	.	.	.	.	.	.	.	.	.	.	.	.	.	.
Site17	NM_003060.4:c.338G>A	LP	PP3_Strong, PM1, PM2_Supporting, PP4	DM	Pathogenic/Likely_pathogenic	Het	missense	exon1	p.C113Y	PMID 25132046	.	.	.	.	.	.	.	.	.	.	.	.	.	.	.	.	.	.	.	.	.	.	.	.	.	.	.	.	.	.	.
Site18	NM_003060.4:c.186G>A	P	PVS1, PM2, PP4	DM	.	Het	nonsense	exon1	p.W62*	PMID 26190315	.	.	.	.	.	.	.	.	.	.	.	.	.	.	.	.	.	.	.	.	.	.	.	.	.	.	.	.	.	.	.
Site19	NM_003060.4:c.235_238del	P	PVS1, PM2, PP4	DM	.	Het	frameshift	exon1	p.H79Afs*50	PMID 27581592	.	.	.	.	.	.	.	.	.	.	.	.	.	.	.	.	.	.	.	.	.	.	.	.	.	.	.	.	.	.	.
Site20	NM_003060.4:c.250T>A	LP	PM1, PM2, PP3_Moderate, PP4	DM	.	Het	missense	exon1	p.Y84N	PMID 28186590	.	.	.	.	.	.	.	.	.	.	.	.	.	.	.	.	.	.	.	.	.	.	.	.	.	.	.	.	.	.	.
Site21	NM_003060.4:c.149G>A	P	PS3, PP3_Strong, PM1, PM2	DM	.	Het	missense	exon1	p.C50Y	PMID 28841266	.	.	.	.	.	.	.	.	.	.	.	.	.	.	.	.	.	.	.	.	.	.	.	.	.	.	.	.	.	.	.
Site22	NM_003060.4:c.344A>G	P	PS3, PP3_Moderate, PM1, PM2, PP4	DM	Uncertain_significance	Het	missense	exon1	p.D115G	PMID 28841266	.	.	.	.	.	.	.	.	.	.	.	.	.	.	.	.	.	.	.	.	.	.	.	.	.	.	.	.	.	.	.
Site23	NM_003060.4:c.278C>G	LP	PS3, PM1	DM	.	Het	missense	exon1	p.S93W	PMID 28841266	.	.	.	.	.	.	.	.	.	.	.	.	.	.	.	.	.	.	.	.	.	.	.	.	.	.	.	.	.	.	.
Site24	NM_003060.4:c.288del	P	PVS1, PM2, PP4	DM	.	Het	frameshift	exon1	p.L97Wfs*33	PMID 31364285	.	.	.	.	.	.	.	.	.	.	.	.	.	.	.	.	.	.	.	.	.	.	.	.	.	.	.	.	.	.	.
Site25	NM_003060.4:c.252_265dup	P	PVS1, PM2, PP4	DM	Likely_pathogenic	Het	frameshift	exon1	p.I89Tfs*46	PMID 32371215	.	.	.	.	.	.	.	.	.	.	.	.	.	.	.	.	.	.	.	.	.	.	.	.	.	.	.	.	.	.	.
Site26	NM_003060.4:c.42G>A	P	PVS1, PM2, PP4	DM	Pathogenic	Het	nonsense	exon1	p.W14*	PMID 32371215	.	.	.	.	.	.	.	.	.	.	.	.	.	.	.	.	.	.	.	.	.	.	.	.	.	.	.	.	.	.	.
Site27	NM_003060.4:c.37G>T	VUS	PVS1, PM2	.	Pathogenic	Het	nonsense	exon1	p.E13*	.	.	.	.	.	.	.	.	.	.	.	.	.	.	.	.	.	.	.	.	.	.	.	.	.	.	.	.	.	.	.	.
Site28	NM_003060.4:c.391G>T	VUS	PVS1, PM2	.	Likely_pathogenic	Het	nonsense	exon1	p.E131*	.	.	.	.	.	.	.	.	.	.	.	.	.	.	.	.	.	.	.	.	.	.	.	.	.	.	.	.	.	.	.	.
Site29	NM_003060.4:c.136_137dup	VUS	PVS1, PM2	.	.	Het	frameshift	exon1	p.E47Rfs*13	.	.	.	.	.	.	.	.	.	.	.	.	.	.	.	.	.	.	.	.	.	.	.	.	.	.	.	.	.	.	.	.
Site30	NM_003060.4:c.69_71del	VUS	.	.	Pathogenic	Het	in-frame indel	exon1	p.F23del	.	.	.	.	.	.	.	.	.	.	.	.	.	.	.	.	.	.	.	.	.	.	.	.	.	.	.	.	.	.	.	.
Site31	NM_003060.4:c.89del	VUS	PVS1, PM2	.	.	Het	frameshift	exon1	p.I30Tfs*13	.	.	.	.	.	.	.	.	.	.	.	.	.	.	.	.	.	.	.	.	.	.	.	.	.	.	.	.	.	.	.	.
Site32	NM_003060.4:c.283C>G	VUS	PM1, PM2	.	Pathogenic	Het	missense	exon1	p.L95V	.	.	.	.	.	.	.	.	.	.	.	.	.	.	.	.	.	.	.	.	.	.	.	.	.	.	.	.	.	.	.	.
Site33	NM_003060.4:c.2T>G	VUS	PVS1, PM2	.	Likely_pathogenic	Het	start loss	exon1	p.M1?	.	.	.	.	.	.	.	.	.	.	.	.	.	.	.	.	.	.	.	.	.	.	.	.	.	.	.	.	.	.	.	.
Site34	NM_003060.4:c.2T>C	VUS	PVS1, PM2	.	Pathogenic	Het	start loss	exon1	p.M1?	.	.	.	.	.	.	.	.	.	.	.	.	.	.	.	.	.	.	.	.	.	.	.	.	.	.	.	.	.	.	.	.
Site35	NM_003060.4:c.1A>T	VUS	PVS1, PM2	.	Likely_pathogenic	Het	start loss	exon1	p.M1?	.	.	.	.	.	.	.	.	.	.	.	.	.	.	.	.	.	.	.	.	.	.	.	.	.	.	.	.	.	.	.	.
Site36	NM_003060.4:c.1A>G	VUS	PVS1, PM2	.	Likely_pathogenic	Het	start loss	exon1	p.M1?	.	.	.	.	.	.	.	.	.	.	.	.	.	.	.	.	.	.	.	.	.	.	.	.	.	.	.	.	.	.	.	.
Site37	NM_003060.4:c.94A>G	VUS	PM1, PM2	.	Likely_pathogenic	Het	missense	exon1	p.N32D	.	.	.	.	.	.	.	.	.	.	.	.	.	.	.	.	.	.	.	.	.	.	.	.	.	.	.	.	.	.	.	.
Site38	NM_003060.4:c.272A>G	VUS	PM1	.	Conflicting_interpretations_of_pathogenicity	Het	missense	exon1	p.N91S	.	19|42038	15|22708	4|19330	0|900	0|470	0|430	31|13660	23|5914	8|7746	0|3320	0|1758	0|1562	0|3132	0|1446	0|1686	40|73836	0|10474	0|2506	0|7968	14|69432	0|64550	0|37372	0|27178	4|2150	2|1100	2|1050	54|143376	0|3044	0|562	0|2482	54|143268
Site39	NM_003060.4:c.137del	VUS	PVS1	.	Likely_pathogenic	Het	frameshift	exon1	p.P46Rfs*13	.	.	.	.	.	.	.	.	.	.	.	.	.	.	.	.	.	.	.	.	.	.	.	.	.	.	.	.	.	.	.	.
Site40	NM_003060.4:c.202C>T	VUS	PM1, PM2	.	Conflicting_interpretations_of_pathogenicity	Het	missense	exon1	p.P68S	.	.	.	.	.	.	.	.	.	.	.	.	.	.	.	.	.	.	.	.	.	.	.	.	.	.	.	.	.	.	.	.
Site41	NM_003060.4:c.361C>T	VUS	PVS1, PM2	.	Pathogenic	Het	nonsense	exon1	p.Q121*	.	.	.	.	.	.	.	.	.	.	.	.	.	.	.	.	.	.	.	.	.	.	.	.	.	.	.	.	.	.	.	.
Site42	NM_003060.4:c.55C>T	VUS	PM2	.	Likely_pathogenic	Het	missense	exon1	p.R19C	.	.	.	.	.	.	.	.	.	.	.	.	.	.	.	.	.	.	.	.	.	.	.	.	.	.	.	.	.	.	.	.
Site43	NM_003060.4:c.212_222dup	VUS	PVS1	.	Pathogenic	Het	frameshift	exon1	p.R75Cfs*59	.	.	.	.	.	.	.	.	.	.	.	.	.	.	.	.	.	.	.	.	.	.	.	.	.	.	.	.	.	.	.	.
Site44	NM_003060.4:c.84C>A	VUS	PM1, PM2, PP3_Moderate	.	Likely_pathogenic	Het	missense	exon1	p.S28R	.	.	.	.	.	.	.	.	.	.	.	.	.	.	.	.	.	.	.	.	.	.	.	.	.	.	.	.	.	.	.	.
Site45	NM_003060.4:c.113C>A	VUS	PM2	.	Pathogenic	Het	missense	exon1	p.S38Y	.	0|42060	0|22718	0|19342	0|900	0|470	0|430	0|13668	0|5916	0|7752	0|3318	0|1756	0|1562	0|3132	0|1446	0|1686	1|73854	0|10484	0|2506	0|7978	0|69478	1|64568	1|37380	0|27188	0|2150	0|1096	0|1054	1|143386	0|3052	0|566	0|2486	1|143332
Site46	NM_003060.4:c.185G>A	VUS	PVS1, PM2	.	Likely_pathogenic	Het	nonsense	exon1	p.W62*	.	.	.	.	.	.	.	.	.	.	.	.	.	.	.	.	.	.	.	.	.	.	.	.	.	.	.	.	.	.	.	.
Site47	NM_003060.4:c.252C>G	VUS	PVS1, PM2	.	Likely_pathogenic	Het	nonsense	exon1	p.Y84*	.	.	.	.	.	.	.	.	.	.	.	.	.	.	.	.	.	.	.	.	.	.	.	.	.	.	.	.	.	.	.	.
Site48	NM_003060.4:c.252C>T	VUS	PM2	.	Likely_benign	Het	synonymous	exon1	p.Y84T	.	.	.	.	.	.	.	.	.	.	.	.	.	.	.	.	.	.	.	.	.	.	.	.	.	.	.	.	.	.	.	.
Site49	NM_003060.4:c.328C>T	VUS	PVS1, PM2	.	Pathogenic	Het	nonsense	exon1	p.Q110*	.	.	.	.	.	.	.	.	.	.	.	.	.	.	.	.	.	.	.	.	.	.	.	.	.	.	.	.	.	.	.	.
Site50	NM_003060.4:c.330G>T	VUS	PM1, PM2	.	.	Het	missense	exon1	p.Q110H	.	.	.	.	.	.	.	.	.	.	.	.	.	.	.	.	.	.	.	.	.	.	.	.	.	.	.	.	.	.	.	.
Site51	NM_003060.4:c.-91_22del	VUS	PVS1	.	Likely_pathogenic	Het	start loss	exon1	.	.	.	.	.	.	.	.	.	.	.	.	.	.	.	.	.	.	.	.	.	.	.	.	.	.	.	.	.	.	.	.	.
Site52	NM_003060.4:c.13del	VUS	PVS1, PM2	.	Likely_pathogenic	Het	frameshift	exon1	p.D5Tfs*3	.	.	.	.	.	.	.	.	.	.	.	.	.	.	.	.	.	.	.	.	.	.	.	.	.	.	.	.	.	.	.	.
Site53	NM_003060.4:c.56_57delinsCT	VUS	.	.	Pathogenic	Het	missense	exon1	p.R19P	.	.	.	.	.	.	.	.	.	.	.	.	.	.	.	.	.	.	.	.	.	.	.	.	.	.	.	.	.	.	.	.
Site54	NM_003060.4:c.52del	VUS	PVS1, PM1, PM2	.	Likely_pathogenic	Het	frameshift	exon1	p.Q18Sfs*25	.	.	.	.	.	.	.	.	.	.	.	.	.	.	.	.	.	.	.	.	.	.	.	.	.	.	.	.	.	.	.	.
Site55	NM_003060.4:c.56G>C	VUS	PM1, PM2	DM	Conflicting_interpretations_of_pathogenicity	Het	missense	exon1	p.R19P	PMID 11715001	.	.	.	.	.	.	.	.	.	.	.	.	.	.	.	.	.	.	.	.	.	.	.	.	.	.	.	.	.	.	.
Site56	NM_003060.4:c.364G>T	VUS	PM1	DM	Conflicting_interpretations_of_pathogenicity	Het	missense	exon1	p.D122Y	PMID 20574985	6|42066	3|22718	3|19348	0|900	0|470	0|430	0|13664	0|5916	0|7748	0|3320	0|1758	0|1562	0|3132	0|1448	0|1684	33|73874	0|10486	0|2506	0|7980	27|69478	54|64582	30|37394	24|27188	0|2154	0|1100	0|1054	60|143392	0|3048	0|564	0|2484	60|143352
Site57	NM_003060.4:c.34G>A	VUS	PM1	.	Conflicting_interpretations_of_pathogenicity	Het	missense	exon1	p.G12S	PMID 20574985	11|42048	6|22708	5|19340	0|900	0|470	0|430	14|13662	4|5914	10|7748	0|3324	0|1762	0|1562	0|3128	0|1448	0|1680	49|73852	12|10484	1|2506	11|7978	44|69450	55|64556	37|37380	18|27176	1|2154	1|1100	0|1054	93|143380	0|3046	0|564	0|2482	93|143302
Site58	NM_003060.4:c.287G>C	VUS	PM1	DM	Conflicting_interpretations_of_pathogenicity	Het	missense	exon1	p.G96A	PMID 20574985	1|42072	0|22718	1|19354	0|900	0|470	0|430	1|13664	1|5916	0|7748	22|3322	13|1760	9|1562	0|3134	0|1448	0|1686	22|73878	0|10482	0|2506	0|7976	19|69478	17|64576	8|37394	9|27182	0|2154	0|1100	0|1054	41|143400	0|3052	0|566	0|2486	41|143356
Site59	NM_003060.4:c.224G>C	VUS	PM1, PM2	DM	Uncertain_significance	Het	missense	exon1	p.R75P	PMID 20574985	0|42062	0|22718	0|19344	0|900	0|470	0|430	0|13670	0|5916	0|7754	0|3324	0|1762	0|1562	0|3132	0|1446	0|1686	2|73868	0|10486	0|2506	0|7980	0|69482	2|64578	2|37386	0|27192	0|2154	0|1100	0|1054	2|143388	0|3044	0|564	0|2480	2|143350
Site60	NM_003060.4:c.196A>C	VUS	PM1, PM2	DM	Uncertain_significance	Het	missense	exon1	p.T66P	PMID 20574985	.	.	.	.	.	.	.	.	.	.	.	.	.	.	.	.	.	.	.	.	.	.	.	.	.	.	.	.	.	.	.
Site61	NM_003060.4:c.368T>G	VUS	PM1, PM2	DM	Uncertain_significance	Het	missense	exon1	p.V123G	PMID 20574985	2|42068	1|22716	1|19352	0|900	0|470	0|430	0|13660	0|5914	0|7746	0|3322	0|1760	0|1562	0|3132	0|1446	0|1686	2|73860	0|10482	0|2506	0|7976	1|69476	1|64566	1|37382	0|27184	0|2154	0|1100	0|1054	3|143374	0|3052	0|566	0|2486	3|143336
Site62	NM_003060.4:c.77G>A	VUS	PM1, PM2	DM	Pathogenic/Likely_pathogenic	Het	missense	exon1	p.S26N	PMID 21922592	0|42056	0|22712	0|19344	0|900	0|470	0|430	1|13662	1|5916	0|7746	0|3324	0|1762	0|1562	0|3126	0|1444	0|1682	1|73858	0|10482	0|2504	0|7978	1|69462	1|64572	0|37388	1|27184	0|2150	0|1098	0|1052	2|143390	0|3048	0|564	0|2484	2|143320
Site63	NM_003060.4:c.131C>T	VUS	PM1	DM	Conflicting_interpretations_of_pathogenicity	Het	missense	exon1	p.A44V	PMID 23653224	0|42056	0|22710	0|19346	0|900	0|470	0|430	1|13664	1|5914	0|7750	0|3322	0|1760	0|1562	0|3134	0|1448	0|1686	2|73846	0|10476	0|2504	0|7972	0|69464	1|64554	1|37374	0|27180	0|2154	0|1100	0|1054	2|143382	0|3050	0|566	0|2484	2|143310
Site64	NM_003060.4:c.47C>T	VUS	PM1, PM2	DM	.	Het	missense	exon1	p.P16L	PMID 28841266	.	.	.	.	.	.	.	.	.	.	.	.	.	.	.	.	.	.	.	.	.	.	.	.	.	.	.	.	.	.	.
Site65	NM_003060.4:c.123C>G	VUS	PM1, PM2	.	Uncertain_significance	Het	missense	exon1	p.F41L	PMID 30626930	.	.	.	.	.	.	.	.	.	.	.	.	.	.	.	.	.	.	.	.	.	.	.	.	.	.	.	.	.	.	.
Site66	NM_003060.4:c.92C>T	VUS	PM1, PM2	DM	Pathogenic	Het	missense	exon1	p.P31L	PMID 30863740	.	.	.	.	.	.	.	.	.	.	.	.	.	.	.	.	.	.	.	.	.	.	.	.	.	.	.	.	.	.	.
Site67	NM_003060.4:c.308T>G	VUS	PM1, PM2	DM	.	Het	missense	exon1	p.V103G	PMID 32371215	.	.	.	.	.	.	.	.	.	.	.	.	.	.	.	.	.	.	.	.	.	.	.	.	.	.	.	.	.	.	.
Site68	NM_003060.4:c.40T>A	VUS	PM1, PM2	.	Pathogenic	Het	missense	exon1	p.W14R	PMID 32371215	.	.	.	.	.	.	.	.	.	.	.	.	.	.	.	.	.	.	.	.	.	.	.	.	.	.	.	.	.	.	.
Site69	NM_003060.4:c.371A>G	VUS	PM1, PM2	DM	Conflicting_interpretations_of_pathogenicity	Het	missense	exon1	p.Y124C	PMID 32371215	.	.	.	.	.	.	.	.	.	.	.	.	.	.	.	.	.	.	.	.	.	.	.	.	.	.	.	.	.	.	.
Site70	NM_003060.4:c.396G>C	LP	PM1, PM2, PP3_Moderate, PP4	.	.	Het	missense	exon2	p.W132C	.	.	.	.	.	.	.	.	.	.	.	.	.	.	.	.	.	.	.	.	.	.	.	.	.	.	.	.	.	.	.	.
Site71	NM_003060.4:c.424G>T	LP	PM2,PS3	DM	Pathogenic/Likely_pathogenic	Het	missense	exon2	p.A142S	PMID 16652335	0|42038	0|22704	0|19334	0|900	0|470	0|430	0|13658	0|5912	0|7746	0|3324	0|1762	0|1562	0|3130	0|1446	0|1684	8|73860	0|10482	0|2506	0|7976	1|69456	9|64582	8|37396	1|27186	0|2152	0|1098	0|1054	9|143396	0|3050	0|566	0|2484	9|143316
Site72	NM_003060.4:c.458_459del	P	PVS1, PM2, PP4	DM	Pathogenic	Het	frameshift	exon2	p.V153Afs*41	PMID 15714519	1|42038	0|22702	1|19336	0|900	0|470	0|430	0|13656	0|5910	0|7746	0|3320	0|1760	0|1560	0|3130	0|1444	0|1686	0|73856	0|10476	0|2506	0|7970	3|69440	2|64580	0|37402	2|27178	0|2154	0|1100	0|1054	3|143378	0|3042	0|562	0|2480	3|143296
Site73	NM_003060.4:c.454G>C	LP	PP3_Strong, PM2, PP4	DM	.	Het	missense	exon2	p.G152R	PMID 23430869	.	.	.	.	.	.	.	.	.	.	.	.	.	.	.	.	.	.	.	.	.	.	.	.	.	.	.	.	.	.	.
Site74	NM_003060.4:c.433dup	P	PVS1, PM2, PP4	DM	.	Het	frameshift	exon2	p.T145Nfs*50	PMID 25132046	.	.	.	.	.	.	.	.	.	.	.	.	.	.	.	.	.	.	.	.	.	.	.	.	.	.	.	.	.	.	.
Site75	NM_003060.4:c.419G>A	P	PVS1, PM2, PP4,	DM	Pathogenic	Het	nonsense	exon2	p.W140*	PMID 28841266	.	.	.	.	.	.	.	.	.	.	.	.	.	.	.	.	.	.	.	.	.	.	.	.	.	.	.	.	.	.	.
Site76	NM_003060.4:c.495C>A	LP	PP3_Strong, PM1, PM2	DM	.	Het	missense	exon2	p.D165E	PMID 31364285	.	.	.	.	.	.	.	.	.	.	.	.	.	.	.	.	.	.	.	.	.	.	.	.	.	.	.	.	.	.	.
Site77	NM_003060.4:c.396G>A	LP	PVS1, PM2_Supporting	DM	Pathogenic/Likely_pathogenic	Het	nonsense	exon2	p.W132*	PMID 9916797	.	.	.	.	.	.	.	.	.	.	.	.	.	.	.	.	.	.	.	.	.	.	.	.	.	.	.	.	.	.	.
Site78	NM_003060.4:c.413A>G	VUS	PM2	.	.	Het	missense	exon2	p.D138G	.	.	.	.	.	.	.	.	.	.	.	.	.	.	.	.	.	.	.	.	.	.	.	.	.	.	.	.	.	.	.	.
Site79	NM_003060.4:c.494_497del	VUS	PVS1	.	Pathogenic	Het	frameshift	exon2	p.D165Gfs*10	.	.	.	.	.	.	.	.	.	.	.	.	.	.	.	.	.	.	.	.	.	.	.	.	.	.	.	.	.	.	.	.
Site80	NM_003060.4:c.479C>A	VUS	PVS1, PM2	.	Pathogenic	Het	nonsense	exon2	p.S160*	.	.	.	.	.	.	.	.	.	.	.	.	.	.	.	.	.	.	.	.	.	.	.	.	.	.	.	.	.	.	.	.
Site81	NM_003060.4:c.491C>G	VUS	PVS1, PM2	.	Likely_pathogenic	Het	nonsense	exon2	p.S164*	.	.	.	.	.	.	.	.	.	.	.	.	.	.	.	.	.	.	.	.	.	.	.	.	.	.	.	.	.	.	.	.
Site82	NM_003060.4:c.395G>A	VUS	PVS1, PM2	.	Pathogenic	Het	nonsense	exon2	p.W132*	.	.	.	.	.	.	.	.	.	.	.	.	.	.	.	.	.	.	.	.	.	.	.	.	.	.	.	.	.	.	.	.
Site83	NM_003060.4:c.420G>A	VUS	PVS1, PM2	.	Pathogenic	Het	nonsense	exon2	p.W140*	.	.	.	.	.	.	.	.	.	.	.	.	.	.	.	.	.	.	.	.	.	.	.	.	.	.	.	.	.	.	.	.
Site84	NM_003060.4:c.455G>A	VUS	PM2	.	Pathogenic/Likely_pathogenic	Het	missense	exon2	p.G152D	.	0|42046	0|22706	0|19340	0|900	0|470	0|430	0|13664	0|5916	0|7748	0|3324	0|1762	0|1562	0|3134	0|1448	0|1686	0|73876	0|10484	0|2506	0|7978	1|69468	1|64588	0|37402	1|27186	0|2154	0|1100	0|1054	1|143388	0|3050	0|566	0|2484	1|143344
Site85	NM_003060.4:c.449del	VUS	PVS1	.	Pathogenic	Het	frameshift	exon2	p.F150Sfs*26	.	.	.	.	.	.	.	.	.	.	.	.	.	.	.	.	.	.	.	.	.	.	.	.	.	.	.	.	.	.	.	.
Site86	NM_003060.4:c.428C>T	VUS	PM2_Supporting, PP3_Moderate, PP4	DM	Pathogenic/Likely_pathogenic	Het	missense	exon2	p.P143L	PMID 20074989	0|42042	0|22706	0|19336	0|900	0|470	0|430	0|13666	0|5916	0|7750	0|3322	0|1762	0|1560	1|3134	1|1448	0|1686	1|73874	0|10484	0|2504	0|7980	0|69464	0|64586	0|37402	0|27184	0|2154	0|1100	0|1054	1|143400	0|3050	0|566	0|2484	1|143338
Site87	NM_003060.4:c.453G>A	VUS	PM2	DM	Conflicting_interpretations_of_pathogenicity	Het	synonymous	exon2	p.V151V	PMID 21922592	0|42056	0|22708	0|19348	0|898	0|468	0|430	0|13660	0|5914	0|7746	0|3322	0|1762	0|1560	0|3132	0|1446	0|1686	1|73872	0|10486	0|2506	0|7980	3|69466	4|64580	1|37402	3|27178	0|2154	0|1100	0|1054	4|143394	0|3050	0|566	0|2484	4|143338
Site88	NM_003060.4:c.447C>G	VUS	PM2	DM	Uncertain_significance	Het	missense	exon2	p.F149L	PMID 28711408	.	.	.	.	.	.	.	.	.	.	.	.	.	.	.	.	.	.	.	.	.	.	.	.	.	.	.	.	.	.	.
Site89	NM_003060.4:c.431T>C	VUS	PM2	DM	.	Het	missense	exon2	p.L144P	PMID 31813139	.	.	.	.	.	.	.	.	.	.	.	.	.	.	.	.	.	.	.	.	.	.	.	.	.	.	.	.	.	.	.
Site90	NM_003060.4:c.400C>G	VUS	PM1, PM2	DM	.	Het	missense	exon2	p.L134V	PMID 32793418	.	.	.	.	.	.	.	.	.	.	.	.	.	.	.	.	.	.	.	.	.	.	.	.	.	.	.	.	.	.	.
Site91	NM_003060.4:c.503G>A	LP	PP3_Strong, PM1, PM2	.	Likely_pathogenic	Het	missense	exon3	p.G168D	.	.	.	.	.	.	.	.	.	.	.	.	.	.	.	.	.	.	.	.	.	.	.	.	.	.	.	.	.	.	.	.
Site92	NM_003060.4:c.506G>A	LP	PP3_Strong, PM1, PM2, PP1, PP4	DM	Pathogenic	Het	missense	exon3	p.R169Q	PMID 10425211	1|42038	1|22700	0|19338	0|900	0|470	0|430	0|13656	0|5908	0|7748	0|3324	0|1762	0|1562	0|3134	0|1448	0|1686	3|73848	0|10474	0|2504	0|7970	1|69446	3|64572	2|37392	1|27180	0|2152	0|1100	0|1052	4|143376	0|3044	0|564	0|2480	4|143294
Site93	NM_003060.4:c.505C>T	LP	PP3_Strong, PM1, PM2_Supporting, PP4	DM	Pathogenic/Likely_pathogenic	Het	missense	exon3	p.R169W	PMID 11058897	.	.	.	.	.	.	.	.	.	.	.	.	.	.	.	.	.	.	.	.	.	.	.	.	.	.	.	.	.	.	.
Site94	NM_003060.4:c.632A>G	LP	PP3_Strong, PM2, PP1, PP4	DM	Pathogenic/Likely_pathogenic	Het	missense	exon3	p.Y211C	PMID 10480371	0|42038	0|22696	0|19342	0|900	0|470	0|430	0|13668	0|5916	0|7752	0|3324	0|1762	0|1562	0|3130	0|1444	0|1686	0|73848	0|10476	0|2506	0|7970	1|69466	1|64578	0|37390	1|27188	0|2154	0|1100	0|1054	1|143368	0|3046	0|564	0|2482	1|143314
Site95	NM_003060.4:c.573del	P	PVS1, PM2, PP4	DM	.	Het	frameshift	exon3	p.N192Ifs*12	PMID 20574985	.	.	.	.	.	.	.	.	.	.	.	.	.	.	.	.	.	.	.	.	.	.	.	.	.	.	.	.	.	.	.
Site96	NM_003060.4:c.538C>T	P	PVS1, PM2, PP4	DM	.	Het	nonsense	exon3	p.Q180*	PMID 23379544	.	.	.	.	.	.	.	.	.	.	.	.	.	.	.	.	.	.	.	.	.	.	.	.	.	.	.	.	.	.	.
Site97	NM_003060.4:c.517del	P	PVS1, PM2, PP4	DM	.	Het	frameshift	exon3	p.L173Cfs*3	PMID 25132046	.	.	.	.	.	.	.	.	.	.	.	.	.	.	.	.	.	.	.	.	.	.	.	.	.	.	.	.	.	.	.
Site98	NM_003060.4:c.597del	P	PVS1, PM2, PP4	DM	.	Het	frameshift	exon3	p.F200Lfs*4	PMID 26030785	.	.	.	.	.	.	.	.	.	.	.	.	.	.	.	.	.	.	.	.	.	.	.	.	.	.	.	.	.	.	.
Site99	NM_003060.4:c.565_568del	P	PVS1, PM2, PP4	DM	.	Het	frameshift	exon3	p.F189Rfs*14	PMID 28841266	.	.	.	.	.	.	.	.	.	.	.	.	.	.	.	.	.	.	.	.	.	.	.	.	.	.	.	.	.	.	.
Site100	NM_003060.4:c.614T>G	P	PS3, PM1, PM2, PP3_Moderate, PP4	DM	Likely_pathogenic	Het	missense	exon3	p.M205R	PMID 28841266	.	.	.	.	.	.	.	.	.	.	.	.	.	.	.	.	.	.	.	.	.	.	.	.	.	.	.	.	.	.	.
Site101	NM_003060.4:c.506G>C	P	PP3_Strong, PM1, PM2, PS3	DM	Pathogenic	Het	missense	exon3	p.R169P	PMID 28841266	.	.	.	.	.	.	.	.	.	.	.	.	.	.	.	.	.	.	.	.	.	.	.	.	.	.	.	.	.	.	.
Site102	NM_003060.4:c.507del	P	PVS1, PM2, PP4	DM	.	Het	frameshift	exon3	p.K170Rfs*6	PMID 32371215	.	.	.	.	.	.	.	.	.	.	.	.	.	.	.	.	.	.	.	.	.	.	.	.	.	.	.	.	.	.	.
Site103	NM_003060.4:c.587_588del	VUS	PVS1	.	Pathogenic	Het	frameshift	exon3	p.F196Cfs*83	.	.	.	.	.	.	.	.	.	.	.	.	.	.	.	.	.	.	.	.	.	.	.	.	.	.	.	.	.	.	.	.
Site104	NM_003060.4:c.631T>C	VUS	.	.	Pathogenic	Het	missense	exon3	p.Y211H	.	.	.	.	.	.	.	.	.	.	.	.	.	.	.	.	.	.	.	.	.	.	.	.	.	.	.	.	.	.	.	.
Site105	NM_003060.4:c.572A>G	VUS	.	.	Conflicting_interpretations_of_pathogenicity	Het	missense	exon3	p.K191R	.	0|42066	0|22720	0|19346	0|900	0|470	0|430	0|13646	0|5912	0|7734	0|3322	0|1762	0|1560	4|3132	2|1446	2|1686	2|73878	0|10484	0|2506	0|7978	2|69446	0|64572	0|37396	0|27176	0|2154	0|1100	0|1054	4|143376	0|3048	0|566	0|2482	4|143324
Site106	NM_003060.4:c.597dup	VUS	PVS1, PM2	.	Pathogenic	Het	frameshift	exon3	p.F200Vfs*80	.	.	.	.	.	.	.	.	.	.	.	.	.	.	.	.	.	.	.	.	.	.	.	.	.	.	.	.	.	.	.	.
Site107	NM_003060.4:c.535A>T	VUS	PM2, PP3_Supporting	.	Uncertain_significance	Het	missense	exon3	p.M179L	PMID 10545605	.	.	.	.	.	.	.	.	.	.	.	.	.	.	.	.	.	.	.	.	.	.	.	.	.	.	.	.	.	.	.
Site108	NM_003060.4:c.641C>T	VUS	.	.	Conflicting_interpretations_of_pathogenicity	Het	missense	exon3	p.A214V	PMID 20027113	0|42054	0|22710	0|19344	0|900	0|470	0|430	0|13664	0|5914	0|7750	0|3324	0|1762	0|1562	0|3132	0|1446	0|1686	5|73864	0|10484	0|2506	0|7978	21|69472	0|64576	0|37392	0|27184	0|2154	0|1100	0|1054	26|143380	26|3048	5|564	21|2484	26|143336
Site109	NM_003060.4:c.557T>C	VUS	PM2	DM	Conflicting_interpretations_of_pathogenicity	Het	missense	exon3	p.L186P	PMID 20574985	1|42078	1|22724	0|19354	0|900	0|470	0|430	0|13666	0|5914	0|7752	0|3324	0|1762	0|1562	0|3134	0|1448	0|1686	1|73886	0|10480	0|2506	0|7974	0|69486	0|64584	0|37396	0|27188	0|2154	0|1100	0|1054	1|143394	0|3052	0|566	0|2486	1|143372
Site110	NM_003060.4:c.529A>G	VUS	PM1	DM	Conflicting_interpretations_of_pathogenicity	Het	missense	exon3	p.M177V	PMID 20574985	37|42042	24|22698	13|19344	0|900	0|470	0|430	2|13658	1|5908	1|7750	0|3322	0|1760	0|1562	0|3134	0|1448	0|1686	25|73850	0|10478	0|2506	0|7972	14|69470	0|64586	0|37396	0|27190	0|2154	0|1100	0|1054	41|143380	0|3046	0|564	0|2482	39|143320
Site111	NM_003060.4:c.629A>G	VUS	PM2	DM	Conflicting_interpretations_of_pathogenicity	Het	missense	exon3	p.N210S	PMID 28841266	0|42046	0|22706	0|19340	0|900	0|470	0|430	0|13666	0|5912	0|7754	0|3324	0|1762	0|1562	0|3134	0|1448	0|1686	1|73862	0|10482	0|2506	0|7976	1|69472	1|64578	1|37394	0|27184	0|2154	0|1100	0|1054	2|143380	1|3050	0|564	1|2486	2|143334
Site112	NM_003060.4:c.523G>A	VUS	PM1	DM	Conflicting_interpretations_of_pathogenicity	Het	missense	exon3	p.V175M	PMID 28841266	1|42034	0|22700	1|19334	0|900	0|470	0|430	0|13662	0|5914	0|7748	0|3320	0|1758	0|1562	2|3134	2|1448	0|1686	2|73842	0|10472	0|2504	0|7968	2|69448	1|64566	0|37382	1|27184	0|2154	0|1100	0|1054	4|143370	0|3048	0|566	0|2482	4|143290
Site113	NM_003060.4:c.538C>G	VUS	PM2	.	Conflicting_interpretations_of_pathogenicity	Het	missense	exon3	p.Q180E	PMID 32371215	.	.	.	.	.	.	.	.	.	.	.	.	.	.	.	.	.	.	.	.	.	.	.	.	.	.	.	.	.	.	.
Site114	NM_003060.4:c.680G>T	LP	PP3_Strong, PM2	.	Likely_pathogenic	Het	missense	exon4	p.R227L	.	.	.	.	.	.	.	.	.	.	.	.	.	.	.	.	.	.	.	.	.	.	.	.	.	.	.	.	.	.	.	.
Site115	NM_003060.4:c.725G>T	LP	PP3_Strong, PM2, PP4	DM	Conflicting_interpretations_of_pathogenicity	Het	missense	exon4	p.G242V	PMID 11058897	.	.	.	.	.	.	.	.	.	.	.	.	.	.	.	.	.	.	.	.	.	.	.	.	.	.	.	.	.	.	.
Site116	NM_003060.4:c.680G>A	LP	PP3_Strong, PM2, PP1, PP4	DM	Pathogenic/Likely_pathogenic	Het	missense	exon4	p.R227H	PMID 20574985	0|42052	0|22716	0|19336	0|900	0|470	0|430	2|13668	1|5914	1|7754	0|3324	0|1762	0|1562	0|3134	0|1448	0|1686	2|73882	0|10478	0|2504	0|7974	3|69462	3|64590	1|37402	2|27188	0|2154	0|1100	0|1054	5|143396	0|3044	0|566	0|2478	5|143344
Site117	NM_003060.4:c.695C>T	LP	PM1, PP3_Supporting, PM2, PP4, PP1	DM	Pathogenic/Likely_pathogenic	Het	missense	exon4	p.T232M	PMID 15714519	10|42056	5|22708	5|19348	0|900	0|470	0|430	1|13658	1|5910	0|7748	0|3322	0|1760	0|1562	1|3132	1|1446	0|1686	14|73864	0|10478	0|2502	0|7976	12|69472	13|64588	6|37402	7|27186	0|2152	0|1100	0|1052	26|143382	1|3050	1|566	0|2484	26|143336
Site118	NM_003060.4:c.760C>T	P	PVS1, PM4, PP1, PP4	DM	Pathogenic	Het	nonsense	exon4	p.R254*	PMID 12204000	0|42026	0|22698	0|19328	0|898	0|468	0|430	0|13652	0|5912	0|7740	0|3318	0|1756	0|1562	3|3132	1|1446	2|1686	1|73832	0|10454	0|2504	0|7950	2|69406	0|64556	0|37382	0|27174	0|2154	0|1100	0|1054	3|143350	0|3048	0|566	0|2482	3|143238
Site119	NM_003060.4:c.806del	P	PVS1, PP1, PP4	DM	Pathogenic/Likely_pathogenic	Het	frameshift	exon4	p.L269Hfs*27	PMID 12409266	0|42032	0|22706	0|19326	0|898	0|468	0|430	1|13656	0|5910	1|7746	0|3324	0|1762	0|1562	0|3130	0|1448	0|1682	0|73856	0|10464	0|2506	0|7958	1|69418	0|64572	0|37390	0|27182	0|2154	0|1100	0|1054	1|143370	0|3044	0|566	0|2478	1|143274
Site120	NM_003060.4:c.768G>A	P	PVS1, PM2, PP4	DM	.	Het	nonsense	exon4	p.W256*	PMID 16652335	.	.	.	.	.	.	.	.	.	.	.	.	.	.	.	.	.	.	.	.	.	.	.	.	.	.	.	.	.	.	.
Site121	NM_003060.4:c.700G>C	LP	PP3_Strong, PM2, PP4	DM	.	Het	missense	exon4	p.G234R	PMID 20074989	.	.	.	.	.	.	.	.	.	.	.	.	.	.	.	.	.	.	.	.	.	.	.	.	.	.	.	.	.	.	.
Site122	NM_003060.4:c.797C>T	LP	PP3_Moderate, PM5, PM2, PP1,PP4	DM	Pathogenic	Het	missense	exon4	p.P266L	PMID 23520115	.	.	.	.	.	.	.	.	.	.	.	.	.	.	.	.	.	.	.	.	.	.	.	.	.	.	.	.	.	.	.
Site123	NM_003060.4:c.745_748del	P	PVS1, PM2, PP4	DM	.	Het	frameshift	exon4	p.F249Lfs*14	PMID 25132046	.	.	.	.	.	.	.	.	.	.	.	.	.	.	.	.	.	.	.	.	.	.	.	.	.	.	.	.	.	.	.
Site124	NM_003060.4:c.740C>G	LP	PS3, PM2, PP4	DM	Pathogenic	Het	missense	exon4	p.P247R	PMID 28841266	.	.	.	.	.	.	.	.	.	.	.	.	.	.	.	.	.	.	.	.	.	.	.	.	.	.	.	.	.	.	.
Site125	NM_003060.4:c.820_821del	P	PVS1, PM2, PP4	DM	.	Het	frameshift	exon4	p.W274Vfs*5	PMID 32793418	.	.	.	.	.	.	.	.	.	.	.	.	.	.	.	.	.	.	.	.	.	.	.	.	.	.	.	.	.	.	.
Site126	NM_003060.4:c.653_654insTATGGCCATCAGGTTGGAG	P	PVS1, PM2, PP4	DM	Pathogenic	Het	frameshift	exon4	p.T219Mfs*67	PMID 9826541	.	.	.	.	.	.	.	.	.	.	.	.	.	.	.	.	.	.	.	.	.	.	.	.	.	.	.	.	.	.	.
Site127	NM_003060.4:c.659A>T	VUS	PM2	.	Likely_pathogenic	Het	missense	exon4	p.E220V	.	.	.	.	.	.	.	.	.	.	.	.	.	.	.	.	.	.	.	.	.	.	.	.	.	.	.	.	.	.	.	.
Site128	NM_003060.4:c.755del	VUS	PVS1	.	Pathogenic	Het	frameshift	exon4	p.F252Sfs*12	.	.	.	.	.	.	.	.	.	.	.	.	.	.	.	.	.	.	.	.	.	.	.	.	.	.	.	.	.	.	.	.
Site129	NM_003060.4:c.818T>C	VUS	PM2	.	Pathogenic	Het	missense	exon4	p.L273P	.	.	.	.	.	.	.	.	.	.	.	.	.	.	.	.	.	.	.	.	.	.	.	.	.	.	.	.	.	.	.	.
Site130	NM_003060.4:c.797C>G	VUS	PM2	.	Likely_pathogenic	Het	missense	exon4	p.P266R	.	0|42004	0|22684	0|19320	0|900	0|470	0|430	0|13654	0|5904	0|7750	0|3324	0|1762	0|1562	0|3132	0|1448	0|1684	0|73812	2|10452	0|2502	2|7950	2|69406	0|64556	0|37378	0|27178	0|2152	0|1100	0|1052	2|143360	0|3044	0|564	0|2480	2|143218
Site131	NM_003060.4:c.679C>T	VUS	PM2	.	Likely_pathogenic	Het	missense	exon4	p.R227C	.	1|42040	0|22704	1|19336	0|898	0|470	0|428	0|13664	0|5914	0|7750	0|3322	0|1762	0|1560	0|3134	0|1448	0|1686	0|73862	0|10482	0|2504	0|7978	1|69452	0|64578	0|37394	0|27184	0|2152	0|1100	0|1052	1|143382	0|3044	0|566	0|2478	1|143314
Site132	NM_003060.4:c.694A>G	VUS	.	.	Likely_pathogenic	Het	missense	exon4	p.T232A	.	1|42046	0|22706	1|19340	0|900	0|470	0|430	1|13658	0|5910	1|7748	0|3322	0|1760	0|1562	0|3130	0|1446	0|1684	0|73852	0|10470	0|2502	0|7968	2|69442	0|64572	0|37394	0|27178	0|2154	0|1100	0|1054	2|143378	0|3042	0|564	0|2478	2|143294
Site133	NM_003060.4:c.802del	VUS	PVS1, PM2	.	Pathogenic	Het	frameshift	exon4	p.V268Cfs*28	.	.	.	.	.	.	.	.	.	.	.	.	.	.	.	.	.	.	.	.	.	.	.	.	.	.	.	.	.	.	.	.
Site134	NM_003060.4:c.718G>A	VUS	PM2	DM	.	Het	missense	exon4	p.A240T	PMID 20574985	.	.	.	.	.	.	.	.	.	.	.	.	.	.	.	.	.	.	.	.	.	.	.	.	.	.	.	.	.	.	.
Site135	NM_003060.4:c.688T>C	VUS	PM2	DM	Pathogenic	Het	missense	exon4	p.F230L	PMID 20574985	2|42052	2|22704	0|19348	0|896	0|468	0|428	0|13664	0|5910	0|7754	0|3322	0|1760	0|1562	0|3130	0|1446	0|1684	2|73856	0|10480	0|2506	0|7974	0|69470	0|64582	0|37396	0|27186	0|2154	0|1100	0|1054	2|143392	0|3046	0|566	0|2480	2|143326
Site136	NM_003060.4:c.769C>T	VUS	PM2	DM	Uncertain_significance	Het	missense	exon4	p.R257W	PMID 20574985	2|42012	1|22692	1|19320	0|900	0|470	0|430	0|13652	0|5912	0|7740	0|3324	0|1762	0|1562	0|3134	0|1448	0|1686	3|73836	0|10466	0|2500	0|7966	3|69420	4|64564	2|37386	2|27178	0|2154	0|1100	0|1054	6|143370	0|3050	0|566	0|2484	6|143256
Site137	NM_003060.4:c.791C>G	VUS	PM2	DM	Conflicting_interpretations_of_pathogenicity	Het	missense	exon4	p.T264R	PMID 20574985	0|42020	0|22696	0|19324	0|900	0|470	0|430	1|13654	1|5910	0|7744	0|3322	0|1762	0|1560	0|3132	0|1448	0|1684	2|73852	0|10460	0|2506	0|7954	0|69406	1|64572	1|37394	0|27178	0|2154	0|1100	0|1054	2|143366	0|3044	0|566	0|2478	2|143258
Site138	NM_003060.4:c.761G>A	VUS	PM2	DM	Conflicting_interpretations_of_pathogenicity	Het	missense	exon4	p.R254Q	PMID 28711408	0|42042	0|22704	0|19338	0|900	0|470	0|430	0|13648	0|5904	0|7744	0|3322	0|1760	0|1562	0|3132	0|1448	0|1684	7|73846	0|10460	0|2502	0|7958	3|69432	10|64572	7|37394	3|27178	0|2150	0|1098	0|1052	10|143370	0|3052	0|566	0|2486	10|143278
Site139	NM_003060.4:c.674C>T	VUS	PM2	DM	.	Het	missense	exon4	p.S225L	PMID 28841266	0|42046	0|22704	0|19342	0|900	0|470	0|430	0|13666	0|5912	0|7754	0|3322	0|1760	0|1562	0|3128	0|1442	0|1686	2|73856	0|10476	0|2506	0|7970	0|69464	2|64584	2|37398	0|27186	0|2152	0|1100	0|1052	2|143376	0|3046	0|564	0|2482	2|143320
Site140	NM_003060.4:c.692C>T	VUS	PM2	DM	Uncertain_significance	Het	missense	exon4	p.S231F	PMID 28841266	0|42052	0|22718	0|19334	0|900	0|470	0|430	0|13656	0|5906	0|7750	0|3322	0|1760	0|1562	0|3134	0|1448	0|1686	1|73878	0|10478	0|2506	0|7972	0|69456	1|64594	1|37404	0|27190	0|2154	0|1100	0|1054	1|143388	0|3044	0|566	0|2478	1|143334
Site141	NM_003060.4:c.774_775insTCG	VUS	.	DM	.	Het	inframe_insertion	exon4	p.M258_L259insS	PMID 31364285	.	.	.	.	.	.	.	.	.	.	.	.	.	.	.	.	.	.	.	.	.	.	.	.	.	.	.	.	.	.	.
Site142	NM_003060.4:c.839C>A	LP	PP3_Strong, PM1	.	Likely_pathogenic	Het	missense	exon5	p.S280Y	rs386134208	.	.	.	.	.	.	.	.	.	.	.	.	.	.	.	.	.	.	.	.	.	.	.	.	.	.	.	.	.	.	.
Site143	NM_003060.4:c.849G>T	LP	PP3_Strong, PM1, PM2	DM	.	Het	missense	exon5	p.W283C	PMID 10545605	.	.	.	.	.	.	.	.	.	.	.	.	.	.	.	.	.	.	.	.	.	.	.	.	.	.	.	.	.	.	.
Site144	NM_003060.4:c.902C>A	LP	PP3_Strong, PM1	DM	Pathogenic	Het	missense	exon5	p.A301D	PMID 11058897	.	.	.	.	.	.	.	.	.	.	.	.	.	.	.	.	.	.	.	.	.	.	.	.	.	.	.	.	.	.	.
Site145	NM_003060.4:c.844del	P	PVS1, PM2, PP4	DM	Pathogenic	Het	frameshift	exon5	p.R282Dfs*14	PMID 12210323	0|41846	0|22610	0|19236	0|900	0|470	0|430	0|13640	0|5900	0|7740	0|3322	0|1762	0|1560	0|3132	0|1448	0|1684	0|73680	0|10414	0|2506	0|7908	1|69212	0|64468	0|37332	0|27136	1|2146	0|1096	1|1050	1|143254	0|3024	0|556	0|2468	1|142892
Site146	NM_003060.4:c.839C>T	LP	PP3_Strong, PM1, PM2, PP1, PP4	DM	Pathogenic	Het	missense	exon5	p.S280F	PMID 15125318	0|42044	0|22710	0|19334	0|900	0|470	0|430	2|13650	0|5906	2|7744	0|3324	0|1762	0|1562	0|3132	0|1446	0|1686	0|73832	0|10472	0|2506	0|7966	2|69430	0|64548	0|37370	0|27178	0|2150	0|1100	0|1050	2|143366	0|3042	0|562	0|2480	2|143262
Site147	NM_003060.4:c.844C>T	P	PVS1, PS3, PM2_Supporting, PP1	DM	Pathogenic	Het	nonsense	exon5	p.R282*	PMID 10051646	3|42006	1|22686	2|19320	0|898	0|470	0|428	1|13660	1|5912	0|7748	0|3324	0|1762	0|1562	0|3134	0|1448	0|1686	4|73822	0|10464	0|2504	0|7960	3|69416	3|64560	2|37378	1|27182	0|2150	0|1098	0|1052	7|143358	0|3042	0|564	0|2478	7|143238
Site148	NM_003060.4:c.845G>A	LP	PP3_Strong, PM1, PM2, PP1, PP4	DM	Pathogenic	Het	missense	exon5	p.R282Q	PMID 16652335	0|42012	0|22682	0|19330	0|900	0|470	0|430	2|13644	1|5906	1|7738	0|3322	0|1760	0|1562	0|3134	0|1448	0|1686	2|73814	0|10472	0|2506	0|7966	1|69424	1|64552	1|37376	0|27176	0|2154	0|1100	0|1054	3|143364	0|3048	0|566	0|2482	3|143238
Site149	NM_003060.4:c.847T>C	LP	PP3_Strong, PM1, PM2	DM	Pathogenic	Het	missense	exon5	p.W283R	PMID 10612840	0|42054	0|22708	0|19346	0|900	0|470	0|430	0|13660	0|5912	0|7748	0|3324	0|1762	0|1562	0|3132	0|1448	0|1684	0|73852	0|10478	0|2506	0|7972	1|69458	1|64564	0|37382	1|27182	0|2154	0|1100	0|1054	1|143382	0|3044	0|564	0|2480	1|143310
Site150	NM_003060.4:c.865C>T	P	PVS1, PM2_Supporting, PP4	DM	Pathogenic	Het	nonsense	exon5	p.R289*	PMID 15714519	.	.	.	.	.	.	.	.	.	.	.	.	.	.	.	.	.	.	.	.	.	.	.	.	.	.	.	.	.	.	.
Site151	NM_003060.4:c.825G>A	P	PVS1, PM2, PP4	DM	Pathogenic	Het	nonsense	exon5	p.W275*	PMID 15714519	.	.	.	.	.	.	.	.	.	.	.	.	.	.	.	.	.	.	.	.	.	.	.	.	.	.	.	.	.	.	.
Site152	NM_003060.4:c.847T>A	P	PS1, PP3_Strong, PM1, PM2, PP4	DM	.	Het	missense	exon5	p.W283R	PMID 16652335	.	.	.	.	.	.	.	.	.	.	.	.	.	.	.	.	.	.	.	.	.	.	.	.	.	.	.	.	.	.	.
Site153	NM_003060.4:c.919del	P	PVS1, PM2, PP4	DM	.	Het	frameshift	exon5	p.V307Lfs*15	PMID 29132460	.	.	.	.	.	.	.	.	.	.	.	.	.	.	.	.	.	.	.	.	.	.	.	.	.	.	.	.	.	.	.
Site154	NM_003060.4:c.896del	P	PVS1, PM2, PP4	DM	.	Het	frameshift	exon5	p.K299Rfs*23	PMID 32371215	.	.	.	.	.	.	.	.	.	.	.	.	.	.	.	.	.	.	.	.	.	.	.	.	.	.	.	.	.	.	.
Site155	NM_003060.4:c.851T>C	LP	PP3_Strong, PM1	DM	.	Het	missense	exon5	p.L284P	PMID 32371215	.	.	.	.	.	.	.	.	.	.	.	.	.	.	.	.	.	.	.	.	.	.	.	.	.	.	.	.	.	.	.
Site156	NM_003060.4:c.901G>A	VUS	PP3_Moderate, PM1, PM2	.	Likely_pathogenic	Het	missense	exon5	p.A301T	.	.	.	.	.	.	.	.	.	.	.	.	.	.	.	.	.	.	.	.	.	.	.	.	.	.	.	.	.	.	.	.
Site157	NM_003060.4:c.835G>T	VUS	PVS1, PM2	.	Pathogenic	Het	nonsense	exon5	p.E279*	.	.	.	.	.	.	.	.	.	.	.	.	.	.	.	.	.	.	.	.	.	.	.	.	.	.	.	.	.	.	.	.
Site158	NM_003060.4:c.881del	VUS	PVS1	.	Pathogenic	Het	frameshift	exon5	p.E294Gfs*2	.	.	.	.	.	.	.	.	.	.	.	.	.	.	.	.	.	.	.	.	.	.	.	.	.	.	.	.	.	.	.	.
Site159	NM_003060.4:c.842C>T	VUS	PM1, PM2	.	Likely_pathogenic	Het	missense	exon5	p.P281L	.	.	.	.	.	.	.	.	.	.	.	.	.	.	.	.	.	.	.	.	.	.	.	.	.	.	.	.	.	.	.	.
Site160	NM_003060.4:c.859C>T	VUS	PVS1, PM2	.	Pathogenic	Het	nonsense	exon5	p.Q287*	.	1|42038	1|22704	0|19334	0|900	0|470	0|430	0|13658	0|5912	0|7746	0|3324	0|1762	0|1562	0|3130	0|1446	0|1684	1|73850	0|10478	0|2506	0|7972	0|69438	0|64562	0|37384	0|27178	0|2148	0|1100	0|1048	1|143366	0|3050	0|566	0|2484	1|143288
Site161	NM_003060.4:c.860_861del	VUS	PVS1, PM2	.	Pathogenic	Het	frameshift	exon5	p.Q287Rfs*4	.	.	.	.	.	.	.	.	.	.	.	.	.	.	.	.	.	.	.	.	.	.	.	.	.	.	.	.	.	.	.	.
Site162	NM_003060.4:c.844dup	VUS	PVS1, PM2	.	Pathogenic	Het	frameshift	exon5	p.R282Pfs*10	.	.	.	.	.	.	.	.	.	.	.	.	.	.	.	.	.	.	.	.	.	.	.	.	.	.	.	.	.	.	.	.
Site163	NM_003060.4:c.904A>G	VUS	PM1	.	Conflicting_interpretations_of_pathogenicity	Het	missense	exon5	p.K302E	PMID 21864509	0|42042	0|22704	0|19338	0|900	0|470	0|430	0|13650	0|5912	0|7738	0|3320	0|1758	0|1562	21|3132	8|1446	13|1686	10|73850	0|10484	0|2504	0|7980	14|69446	0|64570	0|37392	0|27178	1|2152	1|1100	0|1052	24|143370	2|3046	1|564	1|2482	24|143296
Site164	NM_003060.4:c.1051T>C	LP	PP3_Strong, PM1, PM2_Supporting, PP4	DM	Pathogenic	Het	missense	exon6	p.W351R	PMID 11058897	.	.	.	.	.	.	.	.	.	.	.	.	.	.	.	.	.	.	.	.	.	.	.	.	.	.	.	.	.	.	.
Site165	NM_003060.4:c.1009del	P	PVS1, PS3, PP1, PP4	DM	.	Het	frameshift	exon6	p.T337Pfs*12	PMID 12210323	.	.	.	.	.	.	.	.	.	.	.	.	.	.	.	.	.	.	.	.	.	.	.	.	.	.	.	.	.	.	.
Site166	NM_003060.4:c.976C>T	P	PVS1, PM2, PP4	DM	Pathogenic	Het	nonsense	exon6	p.Q326*	PMID 29132460	2|42052	0|22712	2|19340	0|900	0|470	0|430	0|13660	0|5914	0|7746	0|3324	0|1762	0|1562	0|3132	0|1448	0|1684	0|73862	0|10460	0|2504	0|7956	2|69422	0|64570	0|37388	0|27182	0|2150	0|1098	0|1052	2|143382	0|3036	0|566	0|2470	2|143284
Site167	NM_003060.4:c.955C>T	P	PVS1, PM2, PP4	DM	.	Het	nonsense	exon6	p.Q319*	PMID 20574985	.	.	.	.	.	.	.	.	.	.	.	.	.	.	.	.	.	.	.	.	.	.	.	.	.	.	.	.	.	.	.
Site168	NM_003060.4:c.952-5_955del	VUS	PVS1, PM2	.	Pathogenic/Likely_pathogenic	Het	splice-3	exon6	.	.	.	.	.	.	.	.	.	.	.	.	.	.	.	.	.	.	.	.	.	.	.	.	.	.	.	.	.	.	.	.	.
Site169	NM_003060.4:c.1050G>T	VUS	PM2	.	.	Het	splice_region,synonymous	exon6	p.L350L	.	.	.	.	.	.	.	.	.	.	.	.	.	.	.	.	.	.	.	.	.	.	.	.	.	.	.	.	.	.	.	.
Site170	NM_003060.4:c.1006C>T	VUS	PVS1, PM2	.	Pathogenic	Het	nonsense	exon6	p.R336*	.	.	.	.	.	.	.	.	.	.	.	.	.	.	.	.	.	.	.	.	.	.	.	.	.	.	.	.	.	.	.	.
Site171	NM_003060.4:c.1022G>A	VUS	PM1	.	Uncertain_significance	Het	missense	exon6	p.R341Q	.	5|42004	3|22682	2|19322	0|900	0|470	0|430	0|13656	0|5912	0|7744	0|3322	0|1760	0|1562	1|3126	0|1440	1|1686	4|73828	0|10466	0|2506	0|7960	3|69416	1|64576	1|37392	0|27184	0|2152	0|1100	0|1052	7|143376	0|3042	0|566	0|2476	7|143244
Site172	NM_003060.4:c.1048_1052+5del	VUS	PVS1, PM2	.	.	Het	splice-5	exon6	.	.	.	.	.	.	.	.	.	.	.	.	.	.	.	.	.	.	.	.	.	.	.	.	.	.	.	.	.	.	.	.	.
Site173	NM_003060.4:c.1250dup	LP	PVS1_Strong, PM2	.	Pathogenic/Likely_pathogenic	Het	frameshift	exon7	p.M417Ifs*106	rs781330134	.	.	.	.	.	.	.	.	.	.	.	.	.	.	.	.	.	.	.	.	.	.	.	.	.	.	.	.	.	.	.
Site174	NM_003060.4:c.1088T>C	LP	PP3_Strong, PM1, PM2_Supporting	DM	Uncertain_significance	Het	missense	exon7	p.L363P	rs386134214	.	.	.	.	.	.	.	.	.	.	.	.	.	.	.	.	.	.	.	.	.	.	.	.	.	.	.	.	.	.	.
Site175	NM_003060.4:c.1202dup	P	PVS1, PS3, PM2_Supporting, PP1	DM	Pathogenic/Likely_pathogenic	Het	frameshift	exon7	p.Y401*	PMID 10051646	.	.	.	.	.	.	.	.	.	.	.	.	.	.	.	.	.	.	.	.	.	.	.	.	.	.	.	.	.	.	.
Site176	NM_003060.4:c.1072T>A	LP	PP3_Strong, PM1	DM	Pathogenic	Het	missense	exon7	p.Y358N	PMID 20574985	2|42066	1|22720	1|19346	0|900	0|470	0|430	0|13660	0|5912	0|7748	0|3322	0|1760	0|1562	0|3128	0|1444	0|1684	1|73862	0|10480	0|2504	0|7976	1|69472	0|64574	0|37388	0|27186	0|2152	0|1098	0|1054	2|143378	0|3052	0|566	0|2486	2|143334
Site177	NM_003060.4:c.1139C>T	LP	PP3_Moderate, PM2, PP1,PP4	DM	Uncertain_significance	Het	missense	exon7	p.A380V	PMID 23520115	0|42038	0|22702	0|19336	0|900	0|470	0|430	0|13660	0|5910	0|7750	0|3322	0|1760	0|1562	0|3132	0|1446	0|1686	1|73848	0|10476	0|2506	0|7970	1|69460	1|64580	1|37392	0|27188	0|2152	0|1098	0|1054	2|143374	1|3048	0|564	1|2484	2|143308
Site178	NM_003060.4:c.1161T>G	P	PVS1, PM2, PP4	DM	.	Het	nonsense	exon7	p.Y387*	PMID 12204000	0|42044	0|22700	0|19344	0|900	0|470	0|430	0|13664	0|5914	0|7750	0|3322	0|1760	0|1562	1|3128	0|1444	1|1684	0|73852	0|10480	0|2506	0|7974	1|69460	0|64572	0|37392	0|27180	0|2150	0|1100	0|1050	1|143380	0|3052	0|566	0|2486	1|143312
Site179	NM_003060.4:c.1181_1183del	P	PM1, PM4, PM2, PP1, PP4, PS3	DM	Pathogenic/Likely_pathogenic	Het	in-frame indel	exon7	p.L394del	PMID 28841266	1|42044	0|22696	1|19348	0|900	0|470	0|430	23|13668	13|5914	10|7754	0|3322	0|1760	0|1562	0|3126	0|1442	0|1684	14|73848	0|10478	0|2504	0|7974	12|69472	0|64578	0|37396	0|27182	2|2154	1|1100	1|1054	26|143376	0|3050	0|566	0|2484	26|143320
Site180	NM_003060.4:c.1193C>T	P	PM1, PM2, PP1, PP3_Supporting, PP4, PS3	DM	Pathogenic/Likely_pathogenic	Het	missense	exon7	p.P398L	PMID 16652335	4|42004	1|22676	3|19328	0|900	0|470	0|430	0|13664	0|5916	0|7748	0|3322	0|1762	0|1560	0|3132	0|1446	0|1686	6|73830	0|10462	0|2504	0|7958	3|69420	5|64572	5|37394	0|27178	0|2150	0|1098	0|1052	9|143366	0|3044	0|564	0|2480	9|143250
Site181	NM_003060.4:c.1195C>T	LP	PP3_Strong, PM1, PM2, PP1, PP4	DM	Pathogenic/Likely_pathogenic	Het	missense	exon7	p.R399W	PMID 20027113	0|42038	0|22706	0|19332	0|900	0|470	0|430	0|13666	0|5914	0|7752	0|3320	0|1760	0|1560	1|3128	0|1444	1|1684	0|73854	0|10468	0|2500	0|7968	3|69434	2|64572	0|37398	2|27174	0|2148	0|1096	0|1052	3|143380	0|3048	0|566	0|2482	3|143288
Site182	NM_003060.4:c.1196G>A	LP	PP3_Strong, PM1, PM2, PP1, PP4	DM	Pathogenic	Het	missense	exon7	p.R399Q	PMID 11715001	0|42014	0|22696	0|19318	0|900	0|470	0|430	1|13660	0|5912	1|7748	0|3324	0|1762	0|1562	0|3132	0|1446	0|1686	2|73848	0|10462	0|2504	0|7958	1|69412	2|64574	2|37394	0|27180	0|2148	0|1100	0|1048	3|143364	0|3046	0|564	0|2482	3|143260
Site183	NM_003060.4:c.1188T>G	P	PVS1, PM2, PP4	DM	Pathogenic	Het	nonsense	exon7	p.Y396*	PMID 20074989	.	.	.	.	.	.	.	.	.	.	.	.	.	.	.	.	.	.	.	.	.	.	.	.	.	.	.	.	.	.	.
Site184	NM_003060.4:c.1232G>T	LP	PP3_Strong, PM1, PM2, PP4	DM	.	Het	missense	exon7	p.G411V	PMID 23430869	.	.	.	.	.	.	.	.	.	.	.	.	.	.	.	.	.	.	.	.	.	.	.	.	.	.	.	.	.	.	.
Site185	NM_003060.4:c.1252C>T	P	PVS1, PM2, PP4	DM	Pathogenic	Het	nonsense	exon7	p.Q418*	PMID 31737040	.	.	.	.	.	.	.	.	.	.	.	.	.	.	.	.	.	.	.	.	.	.	.	.	.	.	.	.	.	.	.
Site186	NM_003060.4:c.1078_1083dup	VUS	.	.	Conflicting_interpretations_of_pathogenicity	Het	inframe_insertion	exon7	p.G360_L361dup	.	.	.	.	.	.	.	.	.	.	.	.	.	.	.	.	.	.	.	.	.	.	.	.	.	.	.	.	.	.	.	.
Site187	NM_003060.4:c.1229G>A	VUS	PM1	.	Conflicting_interpretations_of_pathogenicity	Het	missense	exon7	p.G410D	.	0|42042	0|22702	0|19340	0|900	0|470	0|430	0|13656	0|5910	0|7746	0|3322	0|1760	0|1562	4|3134	2|1448	2|1686	2|73858	0|10468	0|2506	0|7962	2|69446	0|64580	0|37398	0|27182	0|2154	0|1100	0|1054	4|143362	0|3048	0|564	0|2484	4|143304
Site188	NM_003060.4:c.1060dup	VUS	PVS1	.	Pathogenic	Het	frameshift	exon7	p.I354Nfs*11	.	.	.	.	.	.	.	.	.	.	.	.	.	.	.	.	.	.	.	.	.	.	.	.	.	.	.	.	.	.	.	.
Site189	NM_003060.4:c.1240del	VUS	PVS1	.	Pathogenic	Het	frameshift	exon7	p.L414Ffs*19	.	.	.	.	.	.	.	.	.	.	.	.	.	.	.	.	.	.	.	.	.	.	.	.	.	.	.	.	.	.	.	.
Site190	NM_003060.4:c.1084del	VUS	PVS1, PM2	.	Pathogenic/Likely_pathogenic	Het	frameshift	exon7	p.S362Rfs*13	.	.	.	.	.	.	.	.	.	.	.	.	.	.	.	.	.	.	.	.	.	.	.	.	.	.	.	.	.	.	.	.
Site191	NM_003060.4:c.1158del	VUS	PVS1, PM2	.	Pathogenic	Het	frameshift	exon7	p.Y387Mfs*46	.	.	.	.	.	.	.	.	.	.	.	.	.	.	.	.	.	.	.	.	.	.	.	.	.	.	.	.	.	.	.	.
Site192	NM_003060.4:c.1172G>A	VUS	PVS1, PM2	.	Pathogenic	Het	nonsense	exon7	p.W391*	.	.	.	.	.	.	.	.	.	.	.	.	.	.	.	.	.	.	.	.	.	.	.	.	.	.	.	.	.	.	.	.
Site193	NM_003060.4:c.1085C>T	VUS	PM1, PM2	DM	Uncertain_significance	Het	missense	exon7	p.S362L	PMID 20074989	.	.	.	.	.	.	.	.	.	.	.	.	.	.	.	.	.	.	.	.	.	.	.	.	.	.	.	.	.	.	.
Site194	NM_003060.4:c.1064C>T	VUS	PM1, PM2	DM	.	Het	missense	exon7	p.S355L	PMID 20574985	.	.	.	.	.	.	.	.	.	.	.	.	.	.	.	.	.	.	.	.	.	.	.	.	.	.	.	.	.	.	.
Site195	NM_003060.4:c.1159T>C	VUS	PM1, PM2	DM	Likely_pathogenic	Het	missense	exon7	p.Y387H	PMID 28711408	.	.	.	.	.	.	.	.	.	.	.	.	.	.	.	.	.	.	.	.	.	.	.	.	.	.	.	.	.	.	.
Site196	NM_003060.4:c.1093A>C	VUS	PM1, PM2	DM	.	Het	missense	exon7	p.T365P	PMID 30863740	.	.	.	.	.	.	.	.	.	.	.	.	.	.	.	.	.	.	.	.	.	.	.	.	.	.	.	.	.	.	.
Site197	NM_003060.4:c.1130T>C	VUS	PM1, PM2	DM	.	Het	missense	exon7	p.F377S	PMID 32595695	.	.	.	.	.	.	.	.	.	.	.	.	.	.	.	.	.	.	.	.	.	.	.	.	.	.	.	.	.	.	.
Site198	NM_003060.4:c.1304del	P	PVS1, PM2, PP4	DM	Pathogenic	Het	frameshift	exon8	p.G435Afs*24	PMID 10051646	.	.	.	.	.	.	.	.	.	.	.	.	.	.	.	.	.	.	.	.	.	.	.	.	.	.	.	.	.	.	.
Site199	NM_003060.4:c.1433C>T	LP	PP3_Strong, PM1, PM2, PP4	DM	Likely_pathogenic	Het	missense	exon8	p.P478L	PMID 10072434	.	.	.	.	.	.	.	.	.	.	.	.	.	.	.	.	.	.	.	.	.	.	.	.	.	.	.	.	.	.	.
Site200	NM_003060.4:c.1409C>T	LP	PS3, PP3_Moderate, PM1, PM2	DM	Conflicting_interpretations_of_pathogenicity	Het	missense	exon8	p.S470F	PMID 12210323	.	.	.	.	.	.	.	.	.	.	.	.	.	.	.	.	.	.	.	.	.	.	.	.	.	.	.	.	.	.	.
Site201	NM_003060.4:c.1403C>G	P	PS3, PP3_Strong, PM1, PM2, PP1, PP4	DM	Pathogenic/Likely_pathogenic	Het	missense	exon8	p.T468R	PMID 12210323	.	.	.	.	.	.	.	.	.	.	.	.	.	.	.	.	.	.	.	.	.	.	.	.	.	.	.	.	.	.	.
Site202	NM_003060.4:c.1412G>A	LP	PP3_Strong, PM1, PM2, PP1, PP4	DM	Pathogenic/Likely_pathogenic	Het	missense	exon8	p.R471H	PMID 14605509	.	.	.	.	.	.	.	.	.	.	.	.	.	.	.	.	.	.	.	.	.	.	.	.	.	.	.	.	.	.	.
Site203	NM_003060.4:c.1319C>T	LP	PS3, PP3_Moderate, PM1, PM2, PP1, PP4	DM	Pathogenic	Het	missense	exon8	p.T440M	PMID 12210323	0|42038	0|22706	0|19332	0|900	0|470	0|430	0|13660	0|5912	0|7748	1|3324	1|1762	0|1562	0|3134	0|1448	0|1686	1|73860	3|10472	0|2504	3|7968	5|69444	2|64576	0|37394	2|27182	0|2150	0|1098	0|1052	6|143382	0|3050	0|566	0|2484	6|143304
Site204	NM_003060.4:c.1336G>T	P	PS3, PP3_Moderate, PM1, PM2, PP4	DM	Pathogenic	Het	missense	exon8	p.V446F	PMID 10612840	0|42036	0|22704	0|19332	0|900	0|470	0|430	0|13654	0|5912	0|7742	0|3324	0|1762	0|1562	0|3132	0|1448	0|1684	1|73844	0|10472	0|2504	0|7968	0|69442	1|64568	1|37380	0|27188	0|2154	0|1100	0|1054	1|143380	0|3046	0|564	0|2482	1|143286
Site205	NM_003060.4:c.1411C>T	LP	PP3_Strong, PM1, PM2_Supporting, PP1, PP4	DM	Pathogenic/Likely_pathogenic	Het	missense	exon8	p.R471C	PMID 20074989	.	.	.	.	.	.	.	.	.	.	.	.	.	.	.	.	.	.	.	.	.	.	.	.	.	.	.	.	.	.	.
Site206	NM_003060.4:c.1340A>G	LP	PP3_Moderate, PM1, PP4, PM2_Supporting	DM	Pathogenic/Likely_pathogenic	Het	missense	exon8	p.Y447C	PMID 12408185	0|42006	0|22680	0|19326	0|900	0|470	0|430	0|13656	0|5914	0|7742	0|3318	0|1758	0|1560	0|3132	0|1446	0|1686	1|73828	0|10468	0|2504	0|7964	0|69416	1|64570	1|37390	0|27180	0|2154	0|1100	0|1054	1|143370	0|3040	0|566	0|2474	1|143244
Site207	NM_003060.4:c.1354G>A	LP	PP3_Strong, PM1, PM2	DM	Conflicting_interpretations_of_pathogenicity	Het	missense	exon8	p.E452K	PMID 10679939	1|42002	1|22678	0|19324	0|900	0|470	0|430	0|13652	0|5904	0|7748	0|3320	0|1758	0|1562	0|3134	0|1448	0|1686	1|73814	0|10460	0|2506	0|7954	1|69416	0|64568	0|37384	0|27184	0|2154	0|1100	0|1054	2|143342	1|3040	0|566	1|2474	2|143230
Site208	NM_003060.4:c.1364C>G	LP	PP3_Strong, PM1	DM	Conflicting_interpretations_of_pathogenicity	Het	missense	exon8	p.P455R	PMID 20574985	1|41988	0|22672	1|19316	0|900	0|470	0|430	0|13648	0|5912	0|7736	0|3322	0|1760	0|1562	0|3134	0|1448	0|1686	0|73816	0|10464	0|2506	0|7958	2|69388	1|64560	0|37384	1|27176	0|2152	0|1098	0|1054	2|143356	0|3036	0|566	0|2470	2|143204
Site209	NM_003060.4:c.1412G>C	LP	PM1, PM5, PM2, PP4	DM	Pathogenic	Het	missense	exon8	p.R471P	PMID 21922592	.	.	.	.	.	.	.	.	.	.	.	.	.	.	.	.	.	.	.	.	.	.	.	.	.	.	.	.	.	.	.
Site210	NM_003060.4:c.1400C>G	LP	PP3_Moderate, PM1, PP1, PP4	DM	Pathogenic/Likely_pathogenic	Het	missense	exon8	p.S467C	PMID 10545605	0|42038	0|22702	0|19336	0|900	0|470	0|430	0|13664	0|5912	0|7752	0|3322	0|1760	0|1562	11|3128	8|1442	3|1686	8|73850	0|10466	0|2506	0|7960	4|69450	0|64582	0|37392	0|27190	1|2154	0|1100	1|1054	12|143384	0|3046	0|566	0|2480	12|143300
Site211	NM_003060.4:c.1372del	P	PVS1, PM2, PP4	DM	.	Het	frameshift	exon8	p.V458*	PMID 25132046	.	.	.	.	.	.	.	.	.	.	.	.	.	.	.	.	.	.	.	.	.	.	.	.	.	.	.	.	.	.	.
Site212	NM_003060.4:c.1427T>G	LP	PP3_Moderate, PM1, PM2, PP4	DM	.	Het	missense	exon8	p.L476R	PMID 26075114	.	.	.	.	.	.	.	.	.	.	.	.	.	.	.	.	.	.	.	.	.	.	.	.	.	.	.	.	.	.	.
Site213	NM_003060.4:c.1362T>G	P	PVS1, PM2, PP4	DM	.	Het	nonsense	exon8	p.Y454*	PMID 26990548	.	.	.	.	.	.	.	.	.	.	.	.	.	.	.	.	.	.	.	.	.	.	.	.	.	.	.	.	.	.	.
Site214	NM_003060.4:c.1385G>A	LP	PP3_Strong, PM1	DM	Likely_pathogenic	Het	missense	exon8	p.G462D	PMID 27629047	.	.	.	.	.	.	.	.	.	.	.	.	.	.	.	.	.	.	.	.	.	.	.	.	.	.	.	.	.	.	.
Site215	NM_003060.4:c.1313G>A	LP	PP3_Strong, PM1	DM	Likely_pathogenic	Het	missense	exon8	p.G438E	PMID 28454995	.	.	.	.	.	.	.	.	.	.	.	.	.	.	.	.	.	.	.	.	.	.	.	.	.	.	.	.	.	.	.
Site216	NM_003060.4:c.1385G>T	LP	PP3_Moderate, PM2, PS3	DM	.	Het	missense	exon8	p.G462V	PMID 28841266	.	.	.	.	.	.	.	.	.	.	.	.	.	.	.	.	.	.	.	.	.	.	.	.	.	.	.	.	.	.	.
Site217	NM_003060.4:c.1316T>G	LP	PS3, PM1	DM	.	Het	missense	exon8	p.V439G	PMID 28841266	.	.	.	.	.	.	.	.	.	.	.	.	.	.	.	.	.	.	.	.	.	.	.	.	.	.	.	.	.	.	.
Site218	NM_003060.4:c.1342G>T	LP	PS3, PM1	DM	.	Het	missense	exon8	p.V448L	PMID 28841266	.	.	.	.	.	.	.	.	.	.	.	.	.	.	.	.	.	.	.	.	.	.	.	.	.	.	.	.	.	.	.
Site219	NM_003060.4:c.1316dup	LP	PVS1, PM2, PP4	DM	.	Het	frameshift	exon8	p.T440Hfs*83	PMID 29071542	.	.	.	.	.	.	.	.	.	.	.	.	.	.	.	.	.	.	.	.	.	.	.	.	.	.	.	.	.	.	.
Site220	NM_003060.4:c.1418G>T	LP	PS3, PM1	DM	.	Het	missense	exon8	p.G473V	PMID 31364285	.	.	.	.	.	.	.	.	.	.	.	.	.	.	.	.	.	.	.	.	.	.	.	.	.	.	.	.	.	.	.
Site221	NM_003060.4:c.1340A>T	LP	PM1, PM5, PM2, PP4	DM	.	Het	missense	exon8	p.Y447F	PMID 31364285	.	.	.	.	.	.	.	.	.	.	.	.	.	.	.	.	.	.	.	.	.	.	.	.	.	.	.	.	.	.	.
Site222	NM_003060.4:c.1350del	VUS	PVS1	.	Pathogenic	Het	frameshift	exon8	p.A451Pfs*8	.	.	.	.	.	.	.	.	.	.	.	.	.	.	.	.	.	.	.	.	.	.	.	.	.	.	.	.	.	.	.	.
Site223	NM_003060.4:c.1384G>A	VUS	PP3_Moderate, PM1, PM2	.	Likely_pathogenic	Het	missense	exon8	p.G462S	.	.	.	.	.	.	.	.	.	.	.	.	.	.	.	.	.	.	.	.	.	.	.	.	.	.	.	.	.	.	.	.
Site224	NM_003060.4:c.1432C>T	VUS	PP3_Moderate, PM1, PM2	.	Likely_pathogenic	Het	missense	exon8	p.P478S	.	.	.	.	.	.	.	.	.	.	.	.	.	.	.	.	.	.	.	.	.	.	.	.	.	.	.	.	.	.	.	.
Site225	NM_003060.4:c.1289del	VUS	PVS1	.	Pathogenic	Het	frameshift	exon8	p.V430Afs*3	.	.	.	.	.	.	.	.	.	.	.	.	.	.	.	.	.	.	.	.	.	.	.	.	.	.	.	.	.	.	.	.
Site226	NM_003060.4:c.1347C>A	VUS	PVS1, PM2	.	Pathogenic	Het	nonsense	exon8	p.Y449*	.	.	.	.	.	.	.	.	.	.	.	.	.	.	.	.	.	.	.	.	.	.	.	.	.	.	.	.	.	.	.	.
Site227	NM_003060.4:c.1446C>G	VUS	PVS1, PM2	.	Pathogenic	Het	nonsense	exon8	p.Y482*	.	.	.	.	.	.	.	.	.	.	.	.	.	.	.	.	.	.	.	.	.	.	.	.	.	.	.	.	.	.	.	.
Site228	NM_003060.4:c.1304_1313del	VUS	PVS1	.	.	Het	frameshift	exon8	p.G435Efs*21	.	.	.	.	.	.	.	.	.	.	.	.	.	.	.	.	.	.	.	.	.	.	.	.	.	.	.	.	.	.	.	.
Site229	NM_003060.4:c.1320_1349del	VUS	.	.	.	Het	in-frame indel	exon8	p.A442_A451del	.	.	.	.	.	.	.	.	.	.	.	.	.	.	.	.	.	.	.	.	.	.	.	.	.	.	.	.	.	.	.	.
Site230	NM_003060.4:c.1411C>A	VUS	PP3_Moderate, PM1, PM2	.	Likely_pathogenic	Het	missense	exon8	p.R471S	.	.	.	.	.	.	.	.	.	.	.	.	.	.	.	.	.	.	.	.	.	.	.	.	.	.	.	.	.	.	.	.
Site231	NM_003060.4:c.1365dup	VUS	PVS1_Strong	.	Pathogenic	Het	frameshift	exon8	p.T456Hfs*67	.	.	.	.	.	.	.	.	.	.	.	.	.	.	.	.	.	.	.	.	.	.	.	.	.	.	.	.	.	.	.	.
Site232	NM_003060.4:c.1392_1409delinsCA	VUS	PVS1, PM2	.	.	Het	frameshift	exon8	p.V465Tfs*29	.	.	.	.	.	.	.	.	.	.	.	.	.	.	.	.	.	.	.	.	.	.	.	.	.	.	.	.	.	.	.	.
Site233	NM_003060.4:c.1324_1325delinsAT	VUS	PM2	.	Pathogenic	Het	missense	exon8	p.A442I	.	.	.	.	.	.	.	.	.	.	.	.	.	.	.	.	.	.	.	.	.	.	.	.	.	.	.	.	.	.	.	.
Site234	NM_003060.4:c.1345T>G	VUS	PM1	DM	Conflicting_interpretations_of_pathogenicity	Het	missense	exon8	p.Y449D	PMID 15714519	152|42048	87|22700	65|19348	0|900	0|470	0|430	5|13664	3|5912	2|7752	0|3322	0|1760	0|1562	0|3134	0|1448	0|1686	92|73854	0|10476	0|2506	0|7970	69|69466	1|64574	1|37392	0|27182	2|2154	1|1100	1|1054	161|143382	1|3048	0|566	1|2482	161|143320
Site235	NM_003060.4:c.1327T>G	VUS	PM1, PM2	DM	.	Het	missense	exon8	p.F443V	PMID 20574985	.	.	.	.	.	.	.	.	.	.	.	.	.	.	.	.	.	.	.	.	.	.	.	.	.	.	.	.	.	.	.
Site236	NM_003060.4:c.1298T>C	VUS	PM1, PM2	.	Conflicting_interpretations_of_pathogenicity	Het	missense	exon8	p.M433T	PMID 31364285	.	.	.	.	.	.	.	.	.	.	.	.	.	.	.	.	.	.	.	.	.	.	.	.	.	.	.	.	.	.	.
Site237	NM_003060.4:c.1445A>G	VUS	PM1, PM2	DM	.	Het	missense	exon8	p.Y482C	PMID 32371215	.	.	.	.	.	.	.	.	.	.	.	.	.	.	.	.	.	.	.	.	.	.	.	.	.	.	.	.	.	.	.
Site238	NM_003060.4:c.1396A>G	VUS	PM1, PM2	DM	.	Het	missense	exon8	p.S466G	PMID 32793418	.	.	.	.	.	.	.	.	.	.	.	.	.	.	.	.	.	.	.	.	.	.	.	.	.	.	.	.	.	.	.
Site239	NM_003060.4:c.1556_1559dup	P	PVS1, PM2, PP4	DM	Pathogenic/Likely_pathogenic	Het	frameshift	exon9	p.I521Hfs*3	PMID 17126586	.	.	.	.	.	.	.	.	.	.	.	.	.	.	.	.	.	.	.	.	.	.	.	.	.	.	.	.	.	.	.
Site240	NM_003060.4:c.1458C>A	P	PVS1, PM2, PP4	DM	Likely_pathogenic	Het	nonsense	exon9	p.Y486*	PMID 26990548	.	.	.	.	.	.	.	.	.	.	.	.	.	.	.	.	.	.	.	.	.	.	.	.	.	.	.	.	.	.	.
Site241	NM_003060.4:c.1462C>T	LP	PP3_Moderate, PM1, PP1, PP4	DM	Pathogenic	Het	missense	exon9	p.R488C	PMID 17126586	1|42022	0|22698	1|19324	0|900	0|470	0|430	2|13662	1|5910	1|7752	0|3322	0|1760	0|1562	0|3132	0|1446	0|1686	4|73842	0|10466	0|2502	0|7964	3|69428	4|64570	3|37390	1|27180	0|2150	0|1100	0|1050	7|143370	0|3046	0|566	0|2480	7|143270
Site242	NM_003060.4:c.1554del	VUS	PVS1_Moderate, PM2	.	Pathogenic/Likely_pathogenic	Het	frameshift	exon9	p.D519Tfs*7	.	.	.	.	.	.	.	.	.	.	.	.	.	.	.	.	.	.	.	.	.	.	.	.	.	.	.	.	.	.	.	.
Site243	NM_003060.4:c.1547del	VUS	PVS1	.	Likely_pathogenic	Het	frameshift	exon9	p.P516Hfs*10	.	.	.	.	.	.	.	.	.	.	.	.	.	.	.	.	.	.	.	.	.	.	.	.	.	.	.	.	.	.	.	.
Site244	NM_003060.4:c.1455dup	VUS	PVS1, PM2	.	Likely_pathogenic	Het	frameshift	exon9	p.Y486Lfs*37	.	.	.	.	.	.	.	.	.	.	.	.	.	.	.	.	.	.	.	.	.	.	.	.	.	.	.	.	.	.	.	.
Site245	NM_003060.4:c.1458C>G	VUS	PVS1, PM2	.	Likely_pathogenic	Het	nonsense	exon9	p.Y486*	.	.	.	.	.	.	.	.	.	.	.	.	.	.	.	.	.	.	.	.	.	.	.	.	.	.	.	.	.	.	.	.
Site246	NM_003060.4:c.1463G>A	VUS	PM1, PP3_Supporting, PP4	DM	Conflicting_interpretations_of_pathogenicity	Het	missense	exon9	p.R488H	PMID 16652335	32|42026	25|22706	7|19320	1|900	1|470	0|430	97|13654	31|5910	66|7744	1|3324	0|1762	1|1562	0|3126	0|1444	0|1682	250|73846	9|10456	2|2502	7|7954	241|69398	341|64562	186|37390	155|27172	5|2150	4|1096	1|1054	492|143346	5|3046	1|566	4|2480	491|143244
Site247	NM_003060.4:c.1520T>C	VUS	PM1, PM2	DM	Pathogenic	Het	missense	exon9	p.L507S	PMID 20574985	0|42034	0|22694	0|19340	0|900	0|470	0|430	0|13654	0|5912	0|7742	0|3322	0|1760	0|1562	0|3128	0|1444	0|1684	1|73828	0|10470	0|2502	0|7968	0|69424	1|64550	1|37386	0|27164	0|2146	0|1096	0|1050	1|143368	0|3048	0|564	0|2484	1|143252
Site248	NM_003060.4:c.1507G>C	VUS	PM1, PM2	DM	.	Het	missense	exon9	p.A503P	PMID 25846890	.	.	.	.	.	.	.	.	.	.	.	.	.	.	.	.	.	.	.	.	.	.	.	.	.	.	.	.	.	.	.
Site249	NM_003060.4:c.1451G>T	VUS	PM1	DM	Uncertain_significance	Het	missense	exon9	p.G484V	PMID 26633542	0|42034	0|22698	0|19336	0|900	0|470	0|430	0|13660	0|5912	0|7748	0|3324	0|1762	0|1562	0|3132	0|1446	0|1686	32|73846	7|10474	2|2506	5|7968	23|69434	48|64568	30|37390	18|27178	0|2150	0|1096	0|1054	55|143384	0|3038	0|566	0|2472	55|143280
Site250	NM_003060.4:c.1484T>C	VUS	PM1, PM2	DM	.	Het	missense	exon9	p.M495T	PMID 31813139	.	.	.	.	.	.	.	.	.	.	.	.	.	.	.	.	.	.	.	.	.	.	.	.	.	.	.	.	.	.	.
Site251	NM_003060.4:c.1595_1604dup	VUS	PVS1_Moderate, PM2	.	Conflicting_interpretations_of_pathogenicity	Het	frameshift	exon10	p.P536Qfs*21	.	.	.	.	.	.	.	.	.	.	.	.	.	.	.	.	.	.	.	.	.	.	.	.	.	.	.	.	.	.	.	.
Site252	NM_003060.4:c.1645C>T	B	BA1	.	Benign/Likely_benign	Het	missense	exon10	p.P549S	PMID 23379544	3164|42042	1690|22714	1474|19328	0|900	0|470	0|430	80|13656	30|5914	50|7742	0|3322	0|1760	0|1562	0|3132	0|1448	0|1684	1744|73872	0|10470	0|2506	0|7964	1547|69432	13|64580	4|37396	9|27184	32|2154	20|1100	12|1054	3296|143366	2|3048	0|564	2|2484	3291|143304
Site253	NM_003060.4:c.393+1G>A	LP	PVS1_Strong, PM2	.	Pathogenic/Likely_pathogenic	Het	splice-5	intron1	.	rs1057517069	.	.	.	.	.	.	.	.	.	.	.	.	.	.	.	.	.	.	.	.	.	.	.	.	.	.	.	.	.	.	.
Site254	NM_003060.4:c.394-2A>C	LP	PVS1, PM2	.	Pathogenic	Het	splice-3	intron1	.	rs377724489	2|42056	1|22714	1|19342	0|900	0|470	0|430	0|13662	0|5914	0|7748	0|3322	0|1762	0|1560	0|3130	0|1444	0|1686	1|73866	0|10482	0|2504	0|7978	1|69472	0|64584	0|37394	0|27190	0|2150	0|1098	0|1052	2|143384	0|3052	0|566	0|2486	2|143338
Site255	NM_003060.4:c.394-1G>T	P	PVS1, PM2, PP4	DM	Likely_pathogenic	Het	splice-3	intron1	.	PMID 31813139	.	.	.	.	.	.	.	.	.	.	.	.	.	.	.	.	.	.	.	.	.	.	.	.	.	.	.	.	.	.	.
Site256	NM_003060.4:c.394-141T>C	VUS	PM2	.	Likely_pathogenic	Het	intron	intron1	.	.	.	.	.	.	.	.	.	.	.	.	.	.	.	.	.	.	.	.	.	.	.	.	.	.	.	.	.	.	.	.	.
Site257	NM_003060.4:c.394-2A>T	VUS	PVS1, PM2	.	Likely_pathogenic	Het	splice-3	intron1	.	.	.	.	.	.	.	.	.	.	.	.	.	.	.	.	.	.	.	.	.	.	.	.	.	.	.	.	.	.	.	.	.
Site258	NM_003060.4:c.394-16T>A	VUS	PM2	DM	Conflicting_interpretations_of_pathogenicity	Het	intron	intron1	.	PMID 21922592	0|42040	0|22706	0|19334	0|900	0|470	0|430	0|13660	0|5910	0|7750	0|3324	0|1762	0|1562	0|3134	0|1448	0|1686	1|73852	0|10484	0|2506	0|7978	1|69450	2|64566	1|37386	1|27180	0|2150	0|1098	0|1052	2|143394	0|3044	0|566	0|2478	2|143302
Site259	NM_003060.4:c.393+5G>A	VUS	PM2	DM	Uncertain_significance	Het	splice_region,intron	intron1	.	PMID 25132046	.	.	.	.	.	.	.	.	.	.	.	.	.	.	.	.	.	.	.	.	.	.	.	.	.	.	.	.	.	.	.
Site260	NM_003060.4:c.497+1G>T	P	PVS1, PM2, PP4	DM	.	Het	splice-5	intron2	.	PMID 25132046	.	.	.	.	.	.	.	.	.	.	.	.	.	.	.	.	.	.	.	.	.	.	.	.	.	.	.	.	.	.	.
Site261	NM_003060.4:c.498-2A>G	P	PVS1, PM2, PP4	DM	.	Het	splice-3	intron2	.	PMID 32371215	.	.	.	.	.	.	.	.	.	.	.	.	.	.	.	.	.	.	.	.	.	.	.	.	.	.	.	.	.	.	.
Site262	NM_003060.4:c.497+2T>A	VUS	PVS1, PM2	.	Likely_pathogenic	Het	splice-5	intron2	.	.	.	.	.	.	.	.	.	.	.	.	.	.	.	.	.	.	.	.	.	.	.	.	.	.	.	.	.	.	.	.	.
Site263	NM_003060.4:c.498-1G>C	VUS	PVS1, PM2	.	Likely_pathogenic	Het	splice-3	intron2	.	.	1|42048	0|22708	1|19340	0|900	0|470	0|430	0|13650	0|5902	0|7748	0|3324	0|1762	0|1562	0|3134	0|1448	0|1686	0|73858	0|10474	0|2506	0|7968	1|69454	0|64586	0|37398	0|27188	0|2154	0|1100	0|1054	1|143372	0|3042	0|564	0|2478	1|143312
Site264	NM_003060.4:c.652+1G>A	P	PVS1, PM2, PP4	DM	Pathogenic	Het	splice-5	intron3	.	PMID 12210323	.	.	.	.	.	.	.	.	.	.	.	.	.	.	.	.	.	.	.	.	.	.	.	.	.	.	.	.	.	.	.
Site265	NM_003060.4:c.653-2A>C	LP	PP3_Strong, PM2, PP4	DM	Pathogenic/Likely_pathogenic	Het	splice-3	intron3	.	PMID 28841266	.	.	.	.	.	.	.	.	.	.	.	.	.	.	.	.	.	.	.	.	.	.	.	.	.	.	.	.	.	.	.
Site266	NM_003060.4:c.825-1G>C	LP	PVS1, PM2	.	Likely_pathogenic	Het	splice-3	intron4	.	rs1057516805	.	.	.	.	.	.	.	.	.	.	.	.	.	.	.	.	.	.	.	.	.	.	.	.	.	.	.	.	.	.	.
Site267	NM_003060.4:c.824+1G>A	P	PVS1, PM2, PP4	DM	Likely_pathogenic	Het	splice-5	intron4	.	PMID 31364285	.	.	.	.	.	.	.	.	.	.	.	.	.	.	.	.	.	.	.	.	.	.	.	.	.	.	.	.	.	.	.
Site268	NM_003060.4:c.825-52G>A	VUS	PM2	DM	Pathogenic	Het	intron	intron4	.	PMID 23653224	.	.	.	.	.	.	.	.	.	.	.	.	.	.	.	.	.	.	.	.	.	.	.	.	.	.	.	.	.	.	.
Site269	NM_003060.4:c.952-2A>G	VUS	PVS1, PM2	.	Likely_pathogenic	Het	splice-3	intron5	.	.	.	.	.	.	.	.	.	.	.	.	.	.	.	.	.	.	.	.	.	.	.	.	.	.	.	.	.	.	.	.	.
Site270	NM_003060.4:c.1053-2A>C	LP	PVS1, PM2	.	Pathogenic/Likely_pathogenic	Het	splice-3	intron6	.	rs777004046	0|42062	0|22714	0|19348	0|900	0|470	0|430	0|13660	0|5910	0|7750	0|3322	0|1760	0|1562	0|3132	0|1446	0|1686	1|73862	3|10484	1|2506	2|7978	3|69478	1|64578	0|37390	1|27188	0|2152	0|1100	0|1052	4|143374	0|3050	0|566	0|2484	4|143340
Site271	NM_003060.4:c.1052+1G>T	VUS	PVS1, PM2	.	Likely_pathogenic	Het	splice-5	intron6	.	.	.	.	.	.	.	.	.	.	.	.	.	.	.	.	.	.	.	.	.	.	.	.	.	.	.	.	.	.	.	.	.
Site272	NM_003060.4:c.1053-3_1053-2delinsTC	VUS	.	.	Pathogenic	Het	splice-3	intron6	.	.	.	.	.	.	.	.	.	.	.	.	.	.	.	.	.	.	.	.	.	.	.	.	.	.	.	.	.	.	.	.	.
Site273	NM_003060.4:c.1052+5G>A	VUS	.	.	Conflicting_interpretations_of_pathogenicity	Het	splice_region,intron	intron6	.	.	.	.	.	.	.	.	.	.	.	.	.	.	.	.	.	.	.	.	.	.	.	.	.	.	.	.	.	.	.	.	.
Site274	NM_003060.4:c.1267+1G>A	VUS	PVS1, PM2	.	Likely_pathogenic	Het	splice-5	intron7	.	.	.	.	.	.	.	.	.	.	.	.	.	.	.	.	.	.	.	.	.	.	.	.	.	.	.	.	.	.	.	.	.
Site275	NM_003060.4:c.1267+3_1267+23del	VUS	.	.	.	Het	splice_region,intron	intron7	.	.	.	.	.	.	.	.	.	.	.	.	.	.	.	.	.	.	.	.	.	.	.	.	.	.	.	.	.	.	.	.	.
Site276	NM_003060.4:c.1451-1G>A	P	PVS1, PM2, PP4	DM	Likely_pathogenic	Het	splice-3	intron8	.	PMID 9916797	.	.	.	.	.	.	.	.	.	.	.	.	.	.	.	.	.	.	.	.	.	.	.	.	.	.	.	.	.	.	.
Site277	NM_003060.4:c.1587-2A>G	VUS	PVS1_Moderate, PM2	.	Likely_pathogenic	Het	splice-3	intron9	.	.	.	.	.	.	.	.	.	.	.	.	.	.	.	.	.	.	.	.	.	.	.	.	.	.	.	.	.	.	.	.	.
Site278	NM_003060.4:c.1587-1G>C	VUS	PVS1, PM2	.	Likely_pathogenic	Het	splice-3	intron9	.	.	0|42018	0|22682	0|19336	0|900	0|470	0|430	0|13664	0|5914	0|7750	0|3320	0|1762	0|1558	0|3130	0|1444	0|1686	1|73838	0|10474	0|2506	0|7968	0|69434	1|64564	1|37394	0|27170	0|2154	0|1100	0|1054	1|143368	0|3048	0|566	0|2482	1|143272
Note: "." mean unknown; AC: allele count; AF: allele frequency; AN: allele number; AFR: African American; ASJ: Ashkenazi Jewish; NFE: non-Finland European population; FIN: Finnish in Finland; AMR: admixed American population; SAS: South Asian; EAS: East Asian population; P/LP: pathogenic/likely pathogenic; VUS: variant of unknown significance; Het: Heterozygote.
